# Supplementary material for: Back pain in the midwifery profession in northern Poland
Source: PeerJ. 2025 Mar 26;13:e19079. doi: 10.7717/peerj.19079 (PMC11954461; doi:10.7717/peerj.19079)
Supplement: Supplemental Information 1 — The results of the questionnaires from all midwives participating in the study. These results were used for statistical analysis to analyze the occurrence of back pain in the group of midwives. [file peerj-13-19079-s001.xlsx]

## Sheet: midwives
Year of birth	Sex	Height [cm]	Weight [kg]	BMI	Work experience [years]	What is your work system?	Please provide the average number of working hours per month (last 6 months) [in hours]	Have you ever suffered from spinal pain during your professional career (both in your free time and at work)?	When did the first incident of back pain occur?	Number of pain episodes in the past	The nature of the pain and its frequency	13a. C central	13b. C with radiation to one upper limb	13c. C with radiation to both upper limbs	13d. Th central	13e. Th with radiation	13f. L central	13g. L with radiation to one lower limb	13h. L with radiation to both lower limbs	13i. C	13j. Th	13k. L-S	How would you rate the intensity of your pain episodes (VAS scale)	Have you used sick leave due to spinal pain?	Do you Yese painkillers due to spinal pain?	Are you receiving treatment for back pain (other than painkillers)?	Limitation of physical activity	19a. After lifting	19b. While bending	19c. In standing work	19d. In sedentary work	19e. During torso rotation	19f. During trunk hyperextension	When performing difficult professional tasks, do you most often use	During your free time in the last 7 days, did you engage in physical activity lasting at least 10 minutes?	The average duration of the above physical activity is:	How many times a week on average do you perform the above physical activity?	NDI 1. Pain intensity	NDI 2. Daily activities (washing, dressing, etc.)	NDI 3. Lifting	NDI 4. Reading	NDI 5. Headache	NDI 6. Concentration	NDI 7. Work	NDI 8. Driving a car	NDI 9. Sleeping	NDI 10. Recreation	NDI total points	ODI 1. Pain intensity
1967	Woman	165	90	33.0579	33	Single-shift system, fixed working hours from Monday to Friday	160	Yes	10 or more years ago	6-10	Constant (I have constant pain, all day and often at night, with varying intensity)	1			1		1			1	1	1	4 (moderate)	Yes	Yes	I am receiving private rehabilitation/physiotherapy treatment	Partly		1	1	1			Help from another person	Gentle physical activity (not causing rapid breathing, e.g. walking)	10-30 minutes	6-7	2	0	1	1	2	2	1	1	2	2	14	1
1988	Woman	168	70	24.8016	11	Two-shift system (day/night), 12-hour shifts	160	Yes	7 - 9 years ago	1-5	The pain comes and goes once a month							1				1	4 (moderate)	No	Yes	Medical advice	Partly		1	1				Help from another person	Gentle physical activity (not causing rapid breathing, e.g. walking)	30-50 minutes	4-5	0	0	0	0	1	0	0	0	0	0	1	0
1969	Woman	153	57	24.3496	32	Two-shift system (day/night), 12-hour shifts	160	Yes	10 or more years ago	11 and more	The pain comes and goes once a month	1			1			1		1	1	1	6 (strong)	Yes	Yes	I am using the National Health Fund's rehabilitation/physiotherapy treatment	Limitations make my work difficult	1	1	1	1	1		I don't use any other help, I do them myself	Moderate, moderate physical activity (causing your breathing to get a little faster and your heart to beat a little faster, e.g. cycling, playing volleyball, brisk walking)	50 minutes or more	2-3	2	0	3	3	2	2	2	3	2	2	21	1
1965	Woman	170	85	29.4118	36	Two-shift system (day/night), 12-hour shifts	200	Yes	4-6 years ago	11 and more	The pain comes and goes once a week	1						1		1		1	6 (strong)	No	Yes	I am using the National Health Fund's rehabilitation/physiotherapy treatment	Partly	1		1				I don't use any other help, I do them myself	I didn't do it	not applicable	1	4	1	1	0	0	1	2	1	1	1	12	1
1990	Woman	170	82	28.3737	10	Single-shift system, fixed working hours from Monday to Friday	170	Yes	4-6 years ago	1-5	Constant (I have constant pain, all day and often at night, with varying intensity)						1					1	4 (moderate)	No	Yes	No - I am not undergoing treatment	I don't feel it	1	1			1		I don't use any other help, I do them myself	Gentle physical activity (not causing rapid breathing, e.g. walking)	10-30 minutes	6-7	0	0	0	0	5	1	0	0	0	0	6	2
1975	Woman	178	65	20.5151	25	Single-shift system, fixed working hours from Monday to Friday	170	Yes	10 or more years ago	11 and more	The pain comes and goes once a month	1						1		1		1	6 (strong)	No	Yes	I am receiving private rehabilitation/physiotherapy treatment	Partly	1			1	1		Help from another person	Moderate, moderate physical activity (causing your breathing to get a little faster and your heart to beat a little faster, e.g. cycling, playing volleyball, brisk walking)	30-50 minutes	6-7	0	0	0	0	2	1	0	0	0	0	3	0
1974	Woman	164	53	19.7055	23	Two-shift system (day/night), 12-hour shifts	160	Yes	4-6 years ago	1-5	The pain comes and goes once a week			1				1		1		1	7 (strong/very strong)	Yes	Yes	I am using the National Health Fund's rehabilitation/physiotherapy treatment	Partly	1	1			1		I don't use any other help, I do them myself	Moderate, moderate physical activity (causing your breathing to get a little faster and your heart to beat a little faster, e.g. cycling, playing volleyball, brisk walking)	10-30 minutes	1	2	0	3	2	3	2	1	1	1	2	17	0
1983	Woman	174	77	25.4327	14	Mixed system	220	Yes	4-6 years ago	1-5	The pain has come and gone several times in my professional life.							1				1	5 (moderate/strong)	Yes	Yes	Medical advice	Limitations make my work difficult	1				1		Help from another person	Moderate, moderate physical activity (causing your breathing to get a little faster and your heart to beat a little faster, e.g. cycling, playing volleyball, brisk walking)	30-50 minutes	2-3											0	1
1982	Woman	164	55	20.4491	5	Two-shift system (day/night), 12-hour shifts	140	No	1 year ago	0	The pain has only come and gone once in my professional life.						1					1	2 (mild)	No	No	No - I am not undergoing treatment	I don't feel it							I don't use any other help, I do them myself	I didn't do it	not applicable	1	0	0	0	0	1	0	5	0	0	0	6	0
1976	Woman	159	67	26.5021	23	Single-shift system, fixed working hours from Monday to Friday	120	Yes	2-3 years ago	11 and more	The pain comes and goes once a week	1						1		1		1	3 (mild/moderate)	No	No	I am using the National Health Fund's rehabilitation/physiotherapy treatment	Limitations prevent me from functioning independently	1	1			1		Help from another person	Gentle physical activity (not causing rapid breathing, e.g. walking)	30-50 minutes	2-3											0	2
1994	Woman	165	65	23.8751	6	Mixed system	200	Yes	4-6 years ago	11 and more	Constant (I have constant pain, all day and often at night, with varying intensity)		1		1		1			1	1	1	4 (moderate)	No	Yes	I am using the National Health Fund's rehabilitation/physiotherapy treatment	Partly			1	1	1		Another way	Gentle physical activity (not causing rapid breathing, e.g. walking)	10-30 minutes	2-3	3	1	2	2	4	3	2	2	1	2	22	2
1982	Woman	176	77	24.858	17	Two-shift system (day/night), 12-hour shifts	168	Yes	7 - 9 years ago	6-10	The pain comes and goes once a day						1					1	4 (moderate)	No	No	I am receiving private rehabilitation/physiotherapy treatment	Partly			1				I don't use any other help, I do them myself	Moderate, moderate physical activity (causing your breathing to get a little faster and your heart to beat a little faster, e.g. cycling, playing volleyball, brisk walking)	50 minutes or more	2-3	0	0	2	0	2	2	0	0	2	1	9	1
1965	Woman	157	78	31.6443	38	Single-shift system, fixed working hours from Monday to Friday	48	Yes	10 or more years ago	11 and more	Constant (I have constant pain, all day and often at night, with varying intensity)	1						1		1		1	5 (moderate/strong)	Yes	Yes	Medical advice	Partly	1	1	1	1	1		I don't use any other help, I do them myself	Gentle physical activity (not causing rapid breathing, e.g. walking)	30-50 minutes	1	2	1	1	1	2	0	2	1	1	1	12	2
1981	Woman	175	80	26.1224	19	Two-shift system (day/night), 12-hour shifts	156	Yes	4-6 years ago	11 and more	The pain comes and goes once a day						1					1	5 (moderate/strong)	No	Yes	I am using the National Health Fund's rehabilitation/physiotherapy treatment	Partly	1	1	1				Help from another person	Gentle physical activity (not causing rapid breathing, e.g. walking)	10-30 minutes	2-3				1							1	2
1993	Woman	165	65	23.8751	5	Mixed system	200	Yes	2-3 years ago	6-10	The pain comes and goes once a week							1				1	6 (strong)	Yes	No	I am receiving private rehabilitation/physiotherapy treatment	Partly	1	1					Help from another person	Intense physical activity (causing very rapid breathing and a very rapid heart rate, e.g. aerobics, fast running, fast cycling)	50 minutes or more	4-5	2	0	0	1	3	1	2	1	1	0	11	1
1988	Woman	158	44	17.6254	10	Mixed system	210	Yes	4-6 years ago	1-5	The pain has come and gone several times in my professional life.						1					1	2 (mild)	No	No	No - I am not undergoing treatment	I don't feel it	1						I don't use any other help, I do them myself	Moderate, moderate physical activity (causing your breathing to get a little faster and your heart to beat a little faster, e.g. cycling, playing volleyball, brisk walking)	30-50 minutes	2-3	0	0	0	0	0	0	0	0	0	0	0	0
1977	Woman	162	99	37.7229	25	Mixed system	160	Yes	7 - 9 years ago	11 and more	Constant (I have constant pain, all day and often at night, with varying intensity)							1				1	7 (strong/very strong)	Yes	Yes	I am receiving private rehabilitation/physiotherapy treatment	Partly	1		1			1	I don't use any other help, I do them myself	Gentle physical activity (not causing rapid breathing, e.g. walking)	10-30 minutes	2-3	1	1	1	1	2	1	2	0	1	1	11	1
1997	Woman	165	64	23.5078	2	Two-shift system (day/night), 12-hour shifts	160	Yes	2-3 years ago	1-5	The pain comes and goes once a day	1								1			3 (mild/moderate)	No	No	Other ways	Partly				1	1	1	I don't use any other help, I do them myself	Gentle physical activity (not causing rapid breathing, e.g. walking)	10-30 minutes	1	1	0	0	1	1	1	0	0	2	1	7
1980	Woman	165	62	22.7732	21	Mixed system	170	Yes	10 or more years ago	11 and more	The pain comes and goes once a month		1		1			1		1	1	1	8 (very strong)	Yes	Yes	I am receiving private rehabilitation/physiotherapy treatment	Partly			1				I don't use any other help, I do them myself	Gentle physical activity (not causing rapid breathing, e.g. walking)	10-30 minutes	4-5	0	0	1	2	3	1	1	1	1	2	12	3
1972	Woman	168	78	27.6361	30	Two-shift system (day/night), 12-hour shifts	160	Yes	10 or more years ago	11 and more	The pain comes and goes once a day	1			1		1			1	1	1	5 (moderate/strong)	No		I am using the National Health Fund's rehabilitation/physiotherapy treatment	Partly	1	1	1				Help from another person	Moderate, moderate physical activity (causing your breathing to get a little faster and your heart to beat a little faster, e.g. cycling, playing volleyball, brisk walking)	50 minutes or more	2-3	2	0	1	1	2	1	2	0	1	1	11	1
1986	Woman	168	60	21.2585	14	Mixed system	156	Yes	1 year ago	0	The pain comes and goes once a week							1				1	9 (very severe/the worst pain imaginable)	Yes	Yes	I am using the National Health Fund's rehabilitation/physiotherapy treatment	Partly	1		1		1		Help from another person	Moderate, moderate physical activity (causing your breathing to get a little faster and your heart to beat a little faster, e.g. cycling, playing volleyball, brisk walking)	10-30 minutes	2-3											0	0
1994	Woman	165	68	24.977	6	Mixed system	200	Yes	4-6 years ago	1-5	The pain comes and goes once a week						1					1	5 (moderate/strong)	No	Yes	I am using the National Health Fund's rehabilitation/physiotherapy treatment	Partly	1				1		Help from another person	Moderate, moderate physical activity (causing your breathing to get a little faster and your heart to beat a little faster, e.g. cycling, playing volleyball, brisk walking)	30-50 minutes	2-3	2	0	0	1	2	1	0	0	0	1	7	0
1972	Woman	168	80	28.3447	30	Mixed system	240	Yes	2-3 years ago	6-10	The pain has come and gone several times in my professional life.				1		1				1	1	6 (strong)	No	Yes	Other ways	I don't feel it	1	1	1				Help from another person	Gentle physical activity (not causing rapid breathing, e.g. walking)	10-30 minutes	1											0	1
1967	Woman	167	70	25.0995	34	Single-shift system, fixed working hours from Monday to Friday	156	Yes	10 or more years ago	11 and more	Constant (I have constant pain, all day and often at night, with varying intensity)			1				1		1		1	8 (very strong)	Yes	Yes	I am using the National Health Fund's rehabilitation/physiotherapy treatment	Partly				1	1		Help from another person	Moderate, moderate physical activity (causing your breathing to get a little faster and your heart to beat a little faster, e.g. cycling, playing volleyball, brisk walking)	10-30 minutes	2-3	1	0	2	2	3	2	2	2	2	2	18	1
1962	Woman	164	62	23.0518	38	Single-shift system, fixed working hours from Monday to Friday	160	Yes	10 or more years ago	11 and more	Constant (I have constant pain, all day and often at night, with varying intensity)			1	1				1	1	1	1	6 (strong)	Yes	Yes	I am receiving private rehabilitation/physiotherapy treatment	Partly	1	1	1		1		Help from another person	Moderate, moderate physical activity (causing your breathing to get a little faster and your heart to beat a little faster, e.g. cycling, playing volleyball, brisk walking)	30-50 minutes	2-3	5	1	2	1	1	1	1	0	2	1	15	4
1961	Woman	157	78	31.6443	40	Two-shift system (day/night), 12-hour shifts	168	Yes	10 or more years ago	1-5	The pain comes and goes once a day						1					1	5 (moderate/strong)	No	No	No - I am not undergoing treatment	Partly		1			1		Help from another person	Moderate, moderate physical activity (causing your breathing to get a little faster and your heart to beat a little faster, e.g. cycling, playing volleyball, brisk walking)	10-30 minutes	2-3	1	0	1	1	0	1	1	0	1	4	10	0
1967	Woman	164	77	28.6288	34	Single-shift system, fixed working hours from Monday to Friday	190	Yes	4-6 years ago	1-5	Constant (I have constant pain, all day and often at night, with varying intensity)	1								1			5 (moderate/strong)	No	Yes	I am receiving private rehabilitation/physiotherapy treatment	Partly			1				I don't use any other help, I do them myself	Moderate, moderate physical activity (causing your breathing to get a little faster and your heart to beat a little faster, e.g. cycling, playing volleyball, brisk walking)	30-50 minutes	2-3	2	0	1	1	1	1	2	1	1	1	11	1
1984	Woman	169	64	22.4082	15	Two-shift system (day/night), 12-hour shifts	160	Yes	4-6 years ago	11 and more	Constant (I have constant pain, all day and often at night, with varying intensity)			1	1			1		1	1	1	3 (mild/moderate)	No	Yes	I am using the National Health Fund's rehabilitation/physiotherapy treatment	Partly		1	1		1	1	Help from another person	Gentle physical activity (not causing rapid breathing, e.g. walking)	30-50 minutes	2-3	1	0	0	2	3	1	0	1	0	1	9	0
1972	Woman	162	58	22.1003	22	Two-shift system (day/night), 12-hour shifts	160	Yes	10 or more years ago	6-10	The pain has come and gone several times in my professional life.							1				1	6 (strong)	Yes	Yes	I am using the National Health Fund's rehabilitation/physiotherapy treatment	Partly					1		I don't use any other help, I do them myself	Moderate, moderate physical activity (causing your breathing to get a little faster and your heart to beat a little faster, e.g. cycling, playing volleyball, brisk walking)	30-50 minutes	2-3											0	0
1968	Woman	168	80	28.3447	37	Two-shift system (day/night), 12-hour shifts	165	Yes	4-6 years ago	11 and more	Constant (I have constant pain, all day and often at night, with varying intensity)						1					1	5 (moderate/strong)	Yes	Yes	Medical advice	Partly	1	1					Help from another person	Gentle physical activity (not causing rapid breathing, e.g. walking)	30-50 minutes	4-5											0	2
1991	Woman	178	65	20.5151	8	Two-shift system (day/night), 12-hour shifts	190	Yes	2-3 years ago	11 and more	The pain comes and goes once a week	1			1		1			1	1	1	5 (moderate/strong)	No	No	Other ways	Partly	1	1	1	1	1	1	Help from another person	Moderate, moderate physical activity (causing your breathing to get a little faster and your heart to beat a little faster, e.g. cycling, playing volleyball, brisk walking)	10-30 minutes	6-7	0	0	5	1	2	0	0	0	0	0	8	0
1974	Woman	159	67	26.5021	20	Mixed system	200	Yes	2-3 years ago	11 and more	The pain comes and goes once a month						1					1	4 (moderate)	No	Yes	I am receiving private rehabilitation/physiotherapy treatment	Partly		1	1				I don't use any other help, I do them myself	Gentle physical activity (not causing rapid breathing, e.g. walking)	10-30 minutes	2-3											0	1
1977	Woman	170	68	23.5294	18	Two-shift system (day/night), 12-hour shifts	150	Yes	2-3 years ago	1-5	The pain has come and gone several times in my professional life.	1								1			3 (mild/moderate)	No	No	Other ways	I don't feel it		1	1				I don't use any other help, I do them myself	Moderate, moderate physical activity (causing your breathing to get a little faster and your heart to beat a little faster, e.g. cycling, playing volleyball, brisk walking)	50 minutes or more	2-3	2	0	0	1	2	1	0	0	0	0	6	1
1971	Woman	168	80	28.3447	28	Two-shift system (day/night), 12-hour shifts	150	Yes	10 or more years ago	11 and more	Constant (I have constant pain, all day and often at night, with varying intensity)			1			1			1		1	5 (moderate/strong)	No	Yes	I am receiving private rehabilitation/physiotherapy treatment	Partly	1		1	1			I don't use any other help, I do them myself	Moderate, moderate physical activity (causing your breathing to get a little faster and your heart to beat a little faster, e.g. cycling, playing volleyball, brisk walking)	10-30 minutes	2-3	3	1	2	1	2	2	2	1	1	2	17	2
1977	Woman	168	80	28.3447	23	Two-shift system (day/night), 12-hour shifts	180	Yes	2-3 years ago	1-5	The pain comes and goes once a week						1					1	4 (moderate)	No	No	No - I am not undergoing treatment	I don't feel it		1	1				I don't use any other help, I do them myself	Gentle physical activity (not causing rapid breathing, e.g. walking)	30-50 minutes	2-3	0	0	0	0	4	0	0	0	2	0	6	0
1973	Woman	160	60	23.4375	27	Two-shift system (day/night), 12-hour shifts	150	Yes	10 or more years ago	1-5	The pain has come and gone several times in my professional life.						1					1	4 (moderate)	No	Yes	Other ways	I don't feel it	1	1		1			Help from another person	Gentle physical activity (not causing rapid breathing, e.g. walking)	50 minutes or more	2-3											0	0
1976	Woman	167	58	20.7967	19	Two-shift system (day/night), 12-hour shifts	160	Yes	4-6 years ago	1-5	The pain comes and goes once a day						1					1	4 (moderate)	No	Yes	I am receiving private rehabilitation/physiotherapy treatment	Partly		1				1	Help from another person	Moderate, moderate physical activity (causing your breathing to get a little faster and your heart to beat a little faster, e.g. cycling, playing volleyball, brisk walking)	10-30 minutes	4-5	0	0	1	1	1	1	2	0	2	0	8	1
1996	Woman	165	87	31.9559	5	Two-shift system (day/night), 12-hour shifts	160	Yes	2-3 years ago	1-5	The pain comes and goes once a day						1					1	4 (moderate)	No	Yes	I am receiving private rehabilitation/physiotherapy treatment	Partly	1	1					I don't use any other help, I do them myself	Moderate, moderate physical activity (causing your breathing to get a little faster and your heart to beat a little faster, e.g. cycling, playing volleyball, brisk walking)	10-30 minutes	2-3											0	1
1970	Woman	170	65	22.4913	30	Two-shift system (day/night), 12-hour shifts	160	Yes	10 or more years ago	11 and more	Constant (I have constant pain, all day and often at night, with varying intensity)			1	1		1			1	1	1	5 (moderate/strong)	No	Yes	I am using the National Health Fund's rehabilitation/physiotherapy treatment	Limitations make my work difficult	1	1			1		I don't use any other help, I do them myself	Moderate, moderate physical activity (causing your breathing to get a little faster and your heart to beat a little faster, e.g. cycling, playing volleyball, brisk walking)	10-30 minutes	4-5	1	1	1	2	1	1	0		0	2	9	1
1985	Woman	160	56	21.875	13	Two-shift system (day/night), 12-hour shifts	160	Yes	10 or more years ago	6-10	The pain comes and goes once a year							1				1	5 (moderate/strong)	No	No	I am receiving private rehabilitation/physiotherapy treatment	I don't feel it	1	1	1				Help from another person	Moderate, moderate physical activity (causing your breathing to get a little faster and your heart to beat a little faster, e.g. cycling, playing volleyball, brisk walking)	10-30 minutes	4-5											0	0
1968	Woman	160	60	23.4375	32	Two-shift system (day/night), 12-hour shifts	180	Yes	4-6 years ago	6-10	The pain comes and goes once a month						1					1	2 (mild)	No	Yes	I am receiving private rehabilitation/physiotherapy treatment	Partly	1	1		1			I don't use any other help, I do them myself	Moderate, moderate physical activity (causing your breathing to get a little faster and your heart to beat a little faster, e.g. cycling, playing volleyball, brisk walking)	10-30 minutes	4-5	0	0	1		1	1	1	1	1	1	7	1
1970	Woman	160	90	35.1562	30	Two-shift system (day/night), 12-hour shifts	160	Yes	4-6 years ago	6-10	Constant (I have constant pain, all day and often at night, with varying intensity)			1				1		1		1	6 (strong)	Yes	Yes	I am using the National Health Fund's rehabilitation/physiotherapy treatment	Limitations make my work difficult	1	1	1	1	1		Help from another person	Gentle physical activity (not causing rapid breathing, e.g. walking)	30-50 minutes	6-7	3	1	1	2	2	1	2	2	1	2	17	1
1965	Woman	167	88	31.5537	35	Two-shift system (day/night), 12-hour shifts	170	Yes	10 or more years ago	1-5	The pain comes and goes once a day							1				1	4 (moderate)	No	Yes	I am receiving private rehabilitation/physiotherapy treatment	Partly		1					Help from another person	Moderate, moderate physical activity (causing your breathing to get a little faster and your heart to beat a little faster, e.g. cycling, playing volleyball, brisk walking)	50 minutes or more	4-5	0	0	0	0	3	0	0	0	0	0	3	0
1956	Woman	157	56	22.719	40	Two-shift system (day/night), 12-hour shifts	176	Yes	7 - 9 years ago	11 and more	Constant (I have constant pain, all day and often at night, with varying intensity)							1				1	5 (moderate/strong)	Yes	Yes	Medical advice	Partly				1			I don't use any other help, I do them myself	I didn't do it	50 minutes or more	6-7	3	0	0	2	3	1	0	1	2	1	13	1
1979	Woman	170	63	21.7993	18	Two-shift system (day/night), 12-hour shifts	160	Yes	7 - 9 years ago	6-10	The pain comes and goes once a month	1								1			4 (moderate)	No	Yes	No - I am not undergoing treatment	I don't feel it		1		1			I don't use any other help, I do them myself	Gentle physical activity (not causing rapid breathing, e.g. walking)	30-50 minutes	2-3	2	0	2	1	2	0	0	0	0	1	8
1974	Woman	176	77	24.858	27	Two-shift system (day/night), 12-hour shifts	160	Yes	4-6 years ago	1-5	The pain comes and goes once a day						1					1	4 (moderate)	No	Yes	Other ways	Partly		1					I don't use any other help, I do them myself	Gentle physical activity (not causing rapid breathing, e.g. walking)	not applicable	2-3	1	1	0	1	0	0	0	0	0	0	3	1
1963	Woman	168	67	23.7387	36	Two-shift system (day/night), 12-hour shifts	160	Yes	10 or more years ago	11 and more	The pain comes and goes once a week						1					1	4 (moderate)	No	Yes	No - I am not undergoing treatment	Partly	1						Help from another person	Gentle physical activity (not causing rapid breathing, e.g. walking)	30-50 minutes	2-3	0	0	1	0	2	0	0	0	0	0	3	0
1966	Woman	170	76	26.2976	30	Two-shift system (day/night), 12-hour shifts	150	Yes	2-3 years ago	11 and more	The pain comes and goes once a day		1					1		1		1	4 (moderate)	Yes	Yes	I am using the National Health Fund's rehabilitation/physiotherapy treatment	I don't feel it	1						Help from another person	Moderate, moderate physical activity (causing your breathing to get a little faster and your heart to beat a little faster, e.g. cycling, playing volleyball, brisk walking)	30-50 minutes	2-3	1	1	1	0	1	0	1	0	1	0	6	2
1991	Woman	170	62	21.4533	10	Single-shift system, fixed working hours from Monday to Friday	156	Yes	1 year ago	11 and more	The pain comes and goes once a day		1					1		1		1	5 (moderate/strong)	No	Yes	No - I am not undergoing treatment	Partly				1	1	1	I don't use any other help, I do them myself	Moderate, moderate physical activity (causing your breathing to get a little faster and your heart to beat a little faster, e.g. cycling, playing volleyball, brisk walking)	10-30 minutes	6-7	1	1	0	2	3	1	1	1	0	1	11	1
1971	Woman	158	69	27.6398	17	Mixed system	280	Yes	7 - 9 years ago	11 and more	The pain comes and goes once a week							1				1	3 (mild/moderate)	No	No	No - I am not undergoing treatment	Partly				1			Help from another person	Moderate, moderate physical activity (causing your breathing to get a little faster and your heart to beat a little faster, e.g. cycling, playing volleyball, brisk walking)	30-50 minutes	2-3	1	0	1	1	2	1	2	0	1	0	9	0
1971	Woman	178	80	25.2493	25	Two-shift system (day/night), 12-hour shifts	160	Yes	10 or more years ago	11 and more	The pain comes and goes once a day		1		1			1		1	1	1	4 (moderate)	Yes	Yes	I am using the National Health Fund's rehabilitation/physiotherapy treatment	Partly	1	1	1	1			Help from another person	Gentle physical activity (not causing rapid breathing, e.g. walking)	10-30 minutes	2-3	1	1	4	3	2	1	2	1	2	1	18	1
1964	Woman	160	73	28.5156	38	Two-shift system (day/night), 12-hour shifts	180	Yes	4-6 years ago	1-5	The pain has come and gone several times in my professional life.	1					1			1		1	4 (moderate)	No	No	No - I am not undergoing treatment	I don't feel it	1		1				Help from another person	Moderate, moderate physical activity (causing your breathing to get a little faster and your heart to beat a little faster, e.g. cycling, playing volleyball, brisk walking)	50 minutes or more	4-5	0	0	0	2	0	1	2	0	0	0	5	0
1965	Woman	164	62	23.0518	36	Two-shift system (day/night), 12-hour shifts	156	Yes	10 or more years ago	11 and more	Constant (I have constant pain, all day and often at night, with varying intensity)						1					1	4 (moderate)	No	Yes	I am using the National Health Fund's rehabilitation/physiotherapy treatment	Limitations make my work difficult	1	1					I don't use any other help, I do them myself	Moderate, moderate physical activity (causing your breathing to get a little faster and your heart to beat a little faster, e.g. cycling, playing volleyball, brisk walking)	50 minutes or more	1											0	2
1970	Woman	164	64	23.7954	30	Two-shift system (day/night), 12-hour shifts	160	Yes	4-6 years ago	1-5	The pain comes and goes once a year							1				1	4 (moderate)	No	No	I am receiving private rehabilitation/physiotherapy treatment	Partly		1					I don't use any other help, I do them myself	Moderate, moderate physical activity (causing your breathing to get a little faster and your heart to beat a little faster, e.g. cycling, playing volleyball, brisk walking)	30-50 minutes	2-3											0	0
1970	Woman	158	58	23.2335	24	Two-shift system (day/night), 12-hour shifts	155	Yes	2-3 years ago	1-5	The pain has come and gone several times in my professional life.		1							1			4 (moderate)	No	Yes	I am receiving private rehabilitation/physiotherapy treatment	I don't feel it			1				I don't use any other help, I do them myself	Moderate, moderate physical activity (causing your breathing to get a little faster and your heart to beat a little faster, e.g. cycling, playing volleyball, brisk walking)	50 minutes or more	2-3	0	0	0	0	2	2	0	0	0	0	4	0
2000	Woman	160	58	22.6562	1	Two-shift system (day/night), 12-hour shifts	150	Yes	1 year ago	1-5	The pain comes and goes once a week	1					1			1		1	2 (mild)	No	No	No - I am not undergoing treatment	I don't feel it				1			Help from another person	Gentle physical activity (not causing rapid breathing, e.g. walking)	10-30 minutes	1	1	0	1	2	2	1	0	1	1	1	10	0
1968	Woman	156	60	24.6548	30	Two-shift system (day/night), 12-hour shifts	160	Yes	10 or more years ago	11 and more	The pain comes and goes once a week	1						1		1		1	10 (the worst pain imaginable)	Yes	Yes	I am receiving private rehabilitation/physiotherapy treatment	Limitations make my work difficult		1		1	1		I don't use any other help, I do them myself	Moderate, moderate physical activity (causing your breathing to get a little faster and your heart to beat a little faster, e.g. cycling, playing volleyball, brisk walking)	10-30 minutes	2-3	1	2	3	2	2	1	2	1	2	1	17	1
1969	Woman	162	57	21.7193	28	Single-shift system, fixed working hours from Monday to Friday	160	Yes	10 or more years ago	6-10	The pain comes and goes once a week						1					1	5 (moderate/strong)	No	No	I am using the National Health Fund's rehabilitation/physiotherapy treatment	Partly	1	1					I don't use any other help, I do them myself	Moderate, moderate physical activity (causing your breathing to get a little faster and your heart to beat a little faster, e.g. cycling, playing volleyball, brisk walking)	10-30 minutes	2-3	1	0	1	1	1	1	0	1	0	1	7	1
1990	Woman	169	60	21.0077	8	Single-shift system, fixed working hours from Monday to Friday	160	Yes	4-6 years ago	1-5	The pain comes and goes once a month				1		1				1	1	3 (mild/moderate)	No	No	No - I am not undergoing treatment	Partly		1		1		1	I don't use any other help, I do them myself	Intense physical activity (causing very rapid breathing and a very rapid heart rate, e.g. aerobics, fast running, fast cycling)	10-30 minutes	4-5	0	0	1	0	3	1	0	0	0	0	5	0
1971	Woman	160	60	23.4375	27	Two-shift system (day/night), 12-hour shifts	250	No		0																												0		0	0	1	1	0	0	0	0	2	0
1996	Woman	168	56	19.8413	4	Two-shift system (day/night), 12-hour shifts	160	Yes	2-3 years ago	1-5	The pain comes and goes once a day	1					1			1		1	3 (mild/moderate)	No	No	I am receiving private rehabilitation/physiotherapy treatment	Partly		1		1			Another way	Moderate, moderate physical activity (causing your breathing to get a little faster and your heart to beat a little faster, e.g. cycling, playing volleyball, brisk walking)	10-30 minutes	2-3	2	0	0	2	4	1	0	0	2	1	12	1
2000	Woman	177	62	19.79	1	Two-shift system (day/night), 12-hour shifts	140	Yes	2-3 years ago	1-5	The pain comes and goes once a month	1								1			3 (mild/moderate)	No	No	Other ways	I don't feel it				1			I don't use any other help, I do them myself	Moderate, moderate physical activity (causing your breathing to get a little faster and your heart to beat a little faster, e.g. cycling, playing volleyball, brisk walking)	10-30 minutes	1	1	0	1	2	3	1	0	0	0	0	8	1
1991	Woman	164	54	20.0773	10	Mixed system	200	Yes	2-3 years ago	1-5	The pain comes and goes once a week						1					1	5 (moderate/strong)	No	No	Other ways	I don't feel it	1	1	1				I don't use any other help, I do them myself	Moderate, moderate physical activity (causing your breathing to get a little faster and your heart to beat a little faster, e.g. cycling, playing volleyball, brisk walking)	50 minutes or more	1	2	0	1	1	0	2	0	0	0	0	6	1
1967	Woman	163	64	24.0882	35	Two-shift system (day/night), 12-hour shifts	160	Yes	10 or more years ago	11 and more	Constant (I have constant pain, all day and often at night, with varying intensity)			1				1		1		1	4 (moderate)	No	Yes	I am using the National Health Fund's rehabilitation/physiotherapy treatment	Partly		1					Help from another person	Moderate, moderate physical activity (causing your breathing to get a little faster and your heart to beat a little faster, e.g. cycling, playing volleyball, brisk walking)	30-50 minutes	4-5	1	0	3	1	4	0	0	1	0	1	11	1
1974	Woman	166	66	23.9512	25	Two-shift system (day/night), 12-hour shifts	146	Yes	10 or more years ago	11 and more	The pain comes and goes once a week						1					1	4 (moderate)	No	No	Other ways	I don't feel it	1	1	1				Help from another person	Moderate, moderate physical activity (causing your breathing to get a little faster and your heart to beat a little faster, e.g. cycling, playing volleyball, brisk walking)	10-30 minutes	2-3											0	1
1966	Woman	160	80	31.25	35	Two-shift system (day/night), 12-hour shifts	160	Yes	10 or more years ago	11 and more	The pain comes and goes once a week			1			1			1		1	4 (moderate)	Yes	Yes	I am using the National Health Fund's rehabilitation/physiotherapy treatment	Partly	1	1	1	1	1	1	I don't use any other help, I do them myself	Moderate, moderate physical activity (causing your breathing to get a little faster and your heart to beat a little faster, e.g. cycling, playing volleyball, brisk walking)	50 minutes or more	1	1	0	0	3	1	2	2	2	1	2	14	2
1967	Woman	164	65	24.1672	35	Two-shift system (day/night), 12-hour shifts	156	Yes	10 or more years ago	11 and more	Constant (I have constant pain, all day and often at night, with varying intensity)						1					1	5 (moderate/strong)	Yes	Yes	Medical advice	Partly			1			1	I don't use any other help, I do them myself	Moderate, moderate physical activity (causing your breathing to get a little faster and your heart to beat a little faster, e.g. cycling, playing volleyball, brisk walking)	30-50 minutes	4-5											0	2
1993	Woman	170	68	23.5294	5	Two-shift system (day/night), 12-hour shifts	180	Yes	2-3 years ago	1-5	The pain has come and gone several times in my professional life.							1				1	4 (moderate)	No	No	I am receiving private rehabilitation/physiotherapy treatment	Partly		1				1	I don't use any other help, I do them myself	I didn't do it	not applicable	1	0	0	0	0	2	2	1	0	0	0	5	0
1975	Woman	164	65	24.1672	18	Two-shift system (day/night), 12-hour shifts	166	Yes	7 - 9 years ago	11 and more	The pain comes and goes once a week							1				1	6 (strong)	No	Yes	Medical advice	Partly	1	1					Help from another person	I didn't do it	not applicable												0	2
1988	Woman	172	69	23.3234	7	Mixed system	240	Yes	2-3 years ago	0	The pain has come and gone several times in my professional life.		1					1		1		1	3 (mild/moderate)	No	No	No - I am not undergoing treatment	I don't feel it			1	1			Help from another person	Gentle physical activity (not causing rapid breathing, e.g. walking)	30-50 minutes	1	2	0	0	1	3	1	0	1	0	0	8	0
1962	Woman	165	74	27.1809	39	Two-shift system (day/night), 12-hour shifts	160	Yes	2-3 years ago	1-5	The pain comes and goes once a year						1					1	4 (moderate)	No	No	I am receiving private rehabilitation/physiotherapy treatment	Partly		1				1	Help from another person	Gentle physical activity (not causing rapid breathing, e.g. walking)	10-30 minutes	2-3											0	1
1963	Woman	156	63	25.8876	40	Two-shift system (day/night), 12-hour shifts	170	Yes	10 or more years ago	11 and more	The pain comes and goes once a week		1					1		1		1	7 (strong/very strong)	Yes	Yes	I am using the National Health Fund's rehabilitation/physiotherapy treatment	Partly				1			Another way	Gentle physical activity (not causing rapid breathing, e.g. walking)	10-30 minutes	2-3	2	1	3	3	3	0	1	3	3	3	22	1
1969	Woman	154	80	33.7325	33	Two-shift system (day/night), 12-hour shifts	168	Yes	2-3 years ago	1-5	The pain has come and gone several times in my professional life.	1			1		1			1	1	1	3 (mild/moderate)	No	Yes	Medical advice	I don't feel it	1				1		I don't use any other help, I do them myself	Gentle physical activity (not causing rapid breathing, e.g. walking)	30-50 minutes	4-5	2	0	1	1	3	0	2	1	1	1	12	0
1971	Woman	165	66	24.2424	32	Single-shift system, fixed working hours from Monday to Friday	170	Yes	2-3 years ago	1-5	Constant (I have constant pain, all day and often at night, with varying intensity)	1					1			1		1	3 (mild/moderate)	Yes	No	I am receiving private rehabilitation/physiotherapy treatment	Partly				1			I don't use any other help, I do them myself	Moderate, moderate physical activity (causing your breathing to get a little faster and your heart to beat a little faster, e.g. cycling, playing volleyball, brisk walking)	30-50 minutes	2-3	1	0	0	1	2	0	0	2	0	1	7	0
1958	Woman	164	70	26.0262	45	Two-shift system (day/night), 12-hour shifts	108	Yes	10 or more years ago	6-10	The pain comes and goes once a day								1			1	4 (moderate)	No	Yes	I am receiving private rehabilitation/physiotherapy treatment	Partly		1					Help from another person	Gentle physical activity (not causing rapid breathing, e.g. walking)	10-30 minutes	4-5											0	2
1970	Woman	158	51	20.4294	32	Two-shift system (day/night), 12-hour shifts	164	Yes	4-6 years ago	6-10	Constant (I have constant pain, all day and often at night, with varying intensity)	1					1			1		1	8 (very strong)	Yes	Yes	I am using the National Health Fund's rehabilitation/physiotherapy treatment	Limitations make my work difficult			1				Help from another person	Moderate, moderate physical activity (causing your breathing to get a little faster and your heart to beat a little faster, e.g. cycling, playing volleyball, brisk walking)	30-50 minutes	2-3	2	1	1	2	1	1	2	1	1	1	13	1
1965	Woman	156	80	32.8731	36	Single-shift system, fixed working hours from Monday to Friday	160	Yes	10 or more years ago	1-5	The pain has come and gone several times in my professional life.	1					1			1		1	6 (strong)	Yes	Yes	I am using the National Health Fund's rehabilitation/physiotherapy treatment	Partly		1					Help from another person	Moderate, moderate physical activity (causing your breathing to get a little faster and your heart to beat a little faster, e.g. cycling, playing volleyball, brisk walking)	50 minutes or more	4-5	1	0	1	2	1	0	0	1	0	1	7	1
1966	Woman	162	98	37.3419	36	Two-shift system (day/night), 12-hour shifts	180	Yes	4-6 years ago	1-5	The pain comes and goes once a week		1				1			1		1	5 (moderate/strong)	No	Yes	I am receiving private rehabilitation/physiotherapy treatment	Partly	1	1			1		Help from another person	Gentle physical activity (not causing rapid breathing, e.g. walking)	10-30 minutes	2-3	3	3	3	2	1	0	2	1	1	1	17	2
1970	Woman	177	76	24.2587	32	Two-shift system (day/night), 12-hour shifts	180	Yes	10 or more years ago	11 and more	The pain comes and goes once a day	1						1		1		1	4 (moderate)	Yes	Yes	I am receiving private rehabilitation/physiotherapy treatment	Partly	1						Help from another person	Gentle physical activity (not causing rapid breathing, e.g. walking)	10-30 minutes	2-3	0	0	1	0	2	1	1	0	1	1	7	1
1971	Woman	164	70	26.0262	30	24 hour shifts	156	Yes	4-6 years ago	11 and more	The pain comes and goes once a day	1			1			1		1	1	1	4 (moderate)	Yes	Yes	I am receiving private rehabilitation/physiotherapy treatment	Partly	1	1					Help from another person	Gentle physical activity (not causing rapid breathing, e.g. walking)	10-30 minutes	2-3	2	0	3	2	0	0	2	1	2	1	13	1
1970	Woman	165	87	31.9559	31	Two-shift system (day/night), 12-hour shifts	180	Yes	4-6 years ago	6-10	The pain comes and goes once a month		1		1			1		1	1	1	4 (moderate)	No	Yes	I am receiving private rehabilitation/physiotherapy treatment	Partly	1	1					Help from another person	Gentle physical activity (not causing rapid breathing, e.g. walking)	30-50 minutes	2-3	1	0	2	0	1	0	2	1	1	1	9	0
1968	Woman	168	59	20.9042	33	Two-shift system (day/night), 12-hour shifts	180	Yes	10 or more years ago	11 and more	Constant (I have constant pain, all day and often at night, with varying intensity)	1			1			1		1	1	1	4 (moderate)	No	Yes	No - I am not undergoing treatment	Partly		1	1		1		I don't use any other help, I do them myself	Moderate, moderate physical activity (causing your breathing to get a little faster and your heart to beat a little faster, e.g. cycling, playing volleyball, brisk walking)	10-30 minutes	2-3	1	1	3	2	4	3	2	2	2	3	23	2
1969	Woman	164	60	22.3081	25	Two-shift system (day/night), 12-hour shifts	160	Yes	2-3 years ago	11 and more	The pain comes and goes once a day	1					1			1		1	2 (mild)	No	No	Medical advice	I don't feel it	1						Help from another person	Moderate, moderate physical activity (causing your breathing to get a little faster and your heart to beat a little faster, e.g. cycling, playing volleyball, brisk walking)	50 minutes or more	2-3	0	0	0	0	1	0	0	0	0	0	1	0
1963	Woman	160	90	35.1562	40	Mixed system	180	Yes	10 or more years ago	11 and more	The pain comes and goes once a week	1						1		1		1	4 (moderate)	Yes	Yes	Medical advice	Limitations make my work difficult		1					I don't use any other help, I do them myself	I didn't do it	not applicable	1	1	0	1	2	2	1	2	1	1	2	13	2
1968	Woman	165	90	33.0579	33	Single-shift system, fixed working hours from Monday to Friday	160	Yes	10 or more years ago	6-10	Constant (I have constant pain, all day and often at night, with varying intensity)	1			1		1			1	1	1	4 (moderate)	Yes	Yes	I am receiving private rehabilitation/physiotherapy treatment	Partly		1	1	1			Help from another person	Gentle physical activity (not causing rapid breathing, e.g. walking)	10-30 minutes	6-7	2	0	1	1	2	2	1	1	2	2	14	1
1989	Woman	168	70	24.8016	11	Two-shift system (day/night), 12-hour shifts	160	Yes	7 - 9 years ago	1-5	The pain comes and goes once a month							1				1	4 (moderate)	No	Yes	Medical advice	Partly		1	1				Help from another person	Gentle physical activity (not causing rapid breathing, e.g. walking)	30-50 minutes	4-5	0	0	0	0	1	0	0	0	0	0	1	0
1970	Woman	153	57	24.3496	32	Two-shift system (day/night), 12-hour shifts	160	Yes	10 or more years ago	11 and more	The pain comes and goes once a month	1			1			1		1	1	1	6 (strong)	Yes	Yes	I am using the National Health Fund's rehabilitation/physiotherapy treatment	Limitations make my work difficult	1	1	1	1	1		I don't use any other help, I do them myself	Moderate, moderate physical activity (causing your breathing to get a little faster and your heart to beat a little faster, e.g. cycling, playing volleyball, brisk walking)	50 minutes or more	2-3	2	0	3	3	2	2	2	3	2	2	21	1
1965	Woman	171	85	29.0688	36	Two-shift system (day/night), 12-hour shifts	200	Yes	4-6 years ago	11 and more	The pain comes and goes once a week	1						1		1		1	6 (strong)	No	Yes	I am using the National Health Fund's rehabilitation/physiotherapy treatment	Partly	1		1				I don't use any other help, I do them myself	I didn't do it	not applicable	1	4	1	1	0	0	1	2	1	1	1	12	1
1989	Woman	169	81	28.3604	10	Single-shift system, fixed working hours from Monday to Friday	170	Yes	4-6 years ago	1-5	Constant (I have constant pain, all day and often at night, with varying intensity)						1					1	4 (moderate)	No	Yes	No - I am not undergoing treatment	I don't feel it	1	1			1		I don't use any other help, I do them myself	Gentle physical activity (not causing rapid breathing, e.g. walking)	10-30 minutes	6-7	0	0	0	0	5	1	0	0	0	0	6	2
1974	Woman	178	65	20.5151	25	Single-shift system, fixed working hours from Monday to Friday	170	Yes	10 or more years ago	11 and more	The pain comes and goes once a month	1			1				1	1	1	1	6 (strong)	No	Yes	I am receiving private rehabilitation/physiotherapy treatment	Partly	1			1	1		Help from another person	Moderate, moderate physical activity (causing your breathing to get a little faster and your heart to beat a little faster, e.g. cycling, playing volleyball, brisk walking)	30-50 minutes	6-7	0	0	0	0	2	1	0	0	0	0	3	0
1974	Woman	164	54	20.0773	23	Two-shift system (day/night), 12-hour shifts	160	Yes	4-6 years ago	1-5	The pain comes and goes once a week			1				1		1		1	7 (strong/very strong)	Yes	Yes	I am using the National Health Fund's rehabilitation/physiotherapy treatment	Partly	1	1			1		I don't use any other help, I do them myself	Moderate, moderate physical activity (causing your breathing to get a little faster and your heart to beat a little faster, e.g. cycling, playing volleyball, brisk walking)	10-30 minutes	1	2	0	3	2	3	2	1	1	1	2	17	0
1984	Woman	176	77	24.858	14	Mixed system	220	Yes	4-6 years ago	1-5	The pain has come and gone several times in my professional life.							1				1	5 (moderate/strong)	Yes	Yes	Medical advice	Limitations make my work difficult	1				1		Help from another person	Moderate, moderate physical activity (causing your breathing to get a little faster and your heart to beat a little faster, e.g. cycling, playing volleyball, brisk walking)	30-50 minutes	2-3											0	1
1982	Woman	164	54	20.0773	5	Two-shift system (day/night), 12-hour shifts	140	No	1 year ago	0	The pain has only come and gone once in my professional life.						1					1	2 (mild)	No	No	No - I am not undergoing treatment	I don't feel it							I don't use any other help, I do them myself	I didn't do it	not applicable	1	0	0	0	0	1	0	5	0	0	0	6	0
1975	Woman	159	67	26.5021	23	Single-shift system, fixed working hours from Monday to Friday	120	Yes	2-3 years ago	11 and more	The pain comes and goes once a week	1						1		1		1	3 (mild/moderate)	No	No	I am using the National Health Fund's rehabilitation/physiotherapy treatment	Limitations prevent me from functioning independently	1	1			1		Help from another person	Gentle physical activity (not causing rapid breathing, e.g. walking)	30-50 minutes	2-3											0	2
1994	Woman	167	66	23.6652	6	Mixed system	200	Yes	4-6 years ago	11 and more	Constant (I have constant pain, all day and often at night, with varying intensity)		1		1		1			1	1	1	4 (moderate)	No	Yes	I am using the National Health Fund's rehabilitation/physiotherapy treatment	Partly			1	1	1		Another way	Gentle physical activity (not causing rapid breathing, e.g. walking)	10-30 minutes	2-3	3	1	2	2	2	3	2	2	1	2	20	2
1981	Woman	176	77	24.858	17	Two-shift system (day/night), 12-hour shifts	168	Yes	7 - 9 years ago	6-10	The pain comes and goes once a day						1					1	4 (moderate)	No	No	I am receiving private rehabilitation/physiotherapy treatment	Partly			1				I don't use any other help, I do them myself	Moderate, moderate physical activity (causing your breathing to get a little faster and your heart to beat a little faster, e.g. cycling, playing volleyball, brisk walking)	50 minutes or more	2-3	0	0	2	0	2	2	0	0	2	1	9	1
1964	Woman	158	79	31.6456	38	Single-shift system, fixed working hours from Monday to Friday	48	Yes	10 or more years ago	11 and more	Constant (I have constant pain, all day and often at night, with varying intensity)	1							1	1		1	5 (moderate/strong)	Yes	Yes	Medical advice	Partly	1	1	1		1		I don't use any other help, I do them myself	Gentle physical activity (not causing rapid breathing, e.g. walking)	30-50 minutes	1	2	1	1	1	2	0	2	1	1	1	12	2
1972	Woman	170	65	22.4913	30	Two-shift system (day/night), 12-hour shifts	160	Yes	10 or more years ago	11 and more	Constant (I have constant pain, all day and often at night, with varying intensity)			1	1		1			1	1	1	5 (moderate/strong)	No	Yes	I am using the National Health Fund's rehabilitation/physiotherapy treatment	Limitations make my work difficult	1	1			1		I don't use any other help, I do them myself	Moderate, moderate physical activity (causing your breathing to get a little faster and your heart to beat a little faster, e.g. cycling, playing volleyball, brisk walking)	10-30 minutes	4-5	1	1	1	2	1	1	0		0	2	9	1
1986	Woman	160	56	21.875	13	Two-shift system (day/night), 12-hour shifts	160	Yes	10 or more years ago	6-10	The pain comes and goes once a year							1				1	5 (moderate/strong)	No	No	I am receiving private rehabilitation/physiotherapy treatment	I don't feel it	1	1	1				Help from another person	Moderate, moderate physical activity (causing your breathing to get a little faster and your heart to beat a little faster, e.g. cycling, playing volleyball, brisk walking)	10-30 minutes	4-5											0	0
1967	Woman	162	60	22.8624	32	Two-shift system (day/night), 12-hour shifts	180	Yes	4-6 years ago	6-10	The pain comes and goes once a month						1					1	2 (mild)	No	Yes	I am receiving private rehabilitation/physiotherapy treatment	Partly	1	1		1			I don't use any other help, I do them myself	Moderate, moderate physical activity (causing your breathing to get a little faster and your heart to beat a little faster, e.g. cycling, playing volleyball, brisk walking)	10-30 minutes	4-5	0	0	1		1	1	1	1	1	1	7	1
1970	Woman	160	90	35.1562	30	Two-shift system (day/night), 12-hour shifts	160	Yes	4-6 years ago	6-10	Constant (I have constant pain, all day and often at night, with varying intensity)			1				1		1		1	6 (strong)	Yes	Yes	I am using the National Health Fund's rehabilitation/physiotherapy treatment	Limitations make my work difficult	1	1	1	1	1		Help from another person	Gentle physical activity (not causing rapid breathing, e.g. walking)	30-50 minutes	6-7	3	1	1	2	2	1	2	2	1	2	17	1
1964	Woman	165	88	32.3232	35	Two-shift system (day/night), 12-hour shifts	170	Yes	10 or more years ago	1-5	The pain comes and goes once a day							1				1	4 (moderate)	No	Yes	I am receiving private rehabilitation/physiotherapy treatment	Partly		1					Help from another person	Moderate, moderate physical activity (causing your breathing to get a little faster and your heart to beat a little faster, e.g. cycling, playing volleyball, brisk walking)	50 minutes or more	4-5	0	0	0	0	3	0	0	0	0	0	3	0
1956	Woman	157	56	22.719	40	Two-shift system (day/night), 12-hour shifts	176	Yes	7 - 9 years ago	11 and more	Constant (I have constant pain, all day and often at night, with varying intensity)							1				1	5 (moderate/strong)	Yes	Yes	Medical advice	Partly				1			I don't use any other help, I do them myself	I didn't do it	50 minutes or more	6-7	3	0	0	2	3	1	0	1	2	1	13	1
1980	Woman	172	63	21.2953	18	Two-shift system (day/night), 12-hour shifts	160	Yes	7 - 9 years ago	6-10	The pain comes and goes once a month	1								1			4 (moderate)	No	Yes	No - I am not undergoing treatment	I don't feel it		1		1			I don't use any other help, I do them myself	Gentle physical activity (not causing rapid breathing, e.g. walking)	30-50 minutes	2-3	2	0	2	1	2	0	0	0	0	1	8
1974	Woman	176	77	24.858	27	Two-shift system (day/night), 12-hour shifts	160	Yes	4-6 years ago	1-5	The pain comes and goes once a day						1					1	4 (moderate)	No	Yes	Other ways	Partly		1					I don't use any other help, I do them myself	Gentle physical activity (not causing rapid breathing, e.g. walking)	not applicable	2-3	1	1	0	1	0	0	0	0	0	0	3	1
1964	Woman	166	67	24.3141	36	Two-shift system (day/night), 12-hour shifts	160	Yes	10 or more years ago	11 and more	The pain comes and goes once a week						1					1	4 (moderate)	No	Yes	No - I am not undergoing treatment	Partly	1						Help from another person	Gentle physical activity (not causing rapid breathing, e.g. walking)	30-50 minutes	2-3	0	0	1	0	2	0	0	0	0	0	3	0
1965	Woman	171	76	25.9909	30	Two-shift system (day/night), 12-hour shifts	150	Yes	2-3 years ago	11 and more	The pain comes and goes once a day		1					1		1		1	4 (moderate)	Yes	Yes	I am using the National Health Fund's rehabilitation/physiotherapy treatment	I don't feel it	1						Help from another person	Moderate, moderate physical activity (causing your breathing to get a little faster and your heart to beat a little faster, e.g. cycling, playing volleyball, brisk walking)	30-50 minutes	2-3	1	1	1	0	1	0	1	0	1	0	6	2
2000	Woman	160	58	22.6562	1	Two-shift system (day/night), 12-hour shifts	150	Yes	1 year ago	1-5	The pain comes and goes once a week	1					1			1		1	2 (mild)	No	No	No - I am not undergoing treatment	I don't feel it				1			Help from another person	Gentle physical activity (not causing rapid breathing, e.g. walking)	10-30 minutes	1	1	0	1	2	2	1	0	1	1	1	10	0
1992	Woman	170	68	23.5294	5	Two-shift system (day/night), 12-hour shifts	170	Yes	2-3 years ago	1-5	The pain has come and gone several times in my professional life.							1				1	4 (moderate)	No	No	I am receiving private rehabilitation/physiotherapy treatment	Partly		1			1		I don't use any other help, I do them myself	I didn't do it	not applicable	1	0	0	0	0	2	2	1	0	0	0	5	0
1966	Woman	160	80	31.25	35	Two-shift system (day/night), 12-hour shifts	160	Yes	10 or more years ago	11 and more	The pain comes and goes once a week			1			1			1		1	4 (moderate)	Yes	Yes	I am using the National Health Fund's rehabilitation/physiotherapy treatment	Partly	1	1	1	1	1	1	I don't use any other help, I do them myself	Moderate, moderate physical activity (causing your breathing to get a little faster and your heart to beat a little faster, e.g. cycling, playing volleyball, brisk walking)	50 minutes or more	1	1	0	0	3	1	2	2	2	1	2	14	2
1970	Woman	164	64	23.7954	30	Two-shift system (day/night), 12-hour shifts	160	Yes	4-6 years ago	1-5	The pain comes and goes once a year							1				1	4 (moderate)	No	No	I am receiving private rehabilitation/physiotherapy treatment	Partly		1					I don't use any other help, I do them myself	Moderate, moderate physical activity (causing your breathing to get a little faster and your heart to beat a little faster, e.g. cycling, playing volleyball, brisk walking)	30-50 minutes	2-3											0	0
1971	Woman	158	58	23.2335	24	Two-shift system (day/night), 12-hour shifts	155	Yes	2-3 years ago	1-5	The pain has come and gone several times in my professional life.		1							1			4 (moderate)	No	Yes	I am receiving private rehabilitation/physiotherapy treatment	I don't feel it			1				I don't use any other help, I do them myself	Moderate, moderate physical activity (causing your breathing to get a little faster and your heart to beat a little faster, e.g. cycling, playing volleyball, brisk walking)	50 minutes or more	2-3	0	0	0	0	2	2	0	0	0	0	4	0
1999	Woman	160	58	22.6562	1	Two-shift system (day/night), 12-hour shifts	150	Yes	1 year ago	1-5	The pain comes and goes once a week	1					1			1		1	2 (mild)	No	No	No - I am not undergoing treatment	I don't feel it				1			Help from another person	Gentle physical activity (not causing rapid breathing, e.g. walking)	10-30 minutes	1	1	0	1	2	2	1	0	1	1	1	10	0
1967	Woman	156	60	24.6548	30	Two-shift system (day/night), 12-hour shifts	160	Yes	10 or more years ago	11 and more	The pain comes and goes once a week	1					1			1		1	10 (the worst pain imaginable)	Yes	Yes	I am receiving private rehabilitation/physiotherapy treatment	Limitations make my work difficult		1		1	1		I don't use any other help, I do them myself	Moderate, moderate physical activity (causing your breathing to get a little faster and your heart to beat a little faster, e.g. cycling, playing volleyball, brisk walking)	10-30 minutes	2-3	1	2	3	2	2	1	2	1	4	1	19	1
1968	Woman	162	57	21.7193	28	Single-shift system, fixed working hours from Monday to Friday	150	Yes	10 or more years ago	6-10	The pain comes and goes once a week						1					1	5 (moderate/strong)	No	No	I am using the National Health Fund's rehabilitation/physiotherapy treatment	Partly	1	1					I don't use any other help, I do them myself	Moderate, moderate physical activity (causing your breathing to get a little faster and your heart to beat a little faster, e.g. cycling, playing volleyball, brisk walking)	10-30 minutes	2-3	1	0	1	1	1	1	0	1	0	1	7	1
1972	Woman	162	58	22.1003	22	Two-shift system (day/night), 12-hour shifts	160	Yes	10 or more years ago	6-10	The pain has come and gone several times in my professional life.							1				1	6 (strong)	Yes	Yes	I am using the National Health Fund's rehabilitation/physiotherapy treatment	Partly					1		I don't use any other help, I do them myself	Moderate, moderate physical activity (causing your breathing to get a little faster and your heart to beat a little faster, e.g. cycling, playing volleyball, brisk walking)	30-50 minutes	2-3											0	0
1969	Woman	168	80	28.3447	37	Two-shift system (day/night), 12-hour shifts	165	Yes	4-6 years ago	11 and more	Constant (I have constant pain, all day and often at night, with varying intensity)						1					1	5 (moderate/strong)	Yes	Yes	Medical advice	Partly	1	1					Help from another person	Gentle physical activity (not causing rapid breathing, e.g. walking)	30-50 minutes	4-5											0	2
1990	Woman	179	65	20.2865	8	Two-shift system (day/night), 12-hour shifts	190	Yes	2-3 years ago	11 and more	The pain comes and goes once a week	1			1		1			1	1	1	5 (moderate/strong)	No	No	Other ways	Partly	1	1	1	1	1	1	Help from another person	Moderate, moderate physical activity (causing your breathing to get a little faster and your heart to beat a little faster, e.g. cycling, playing volleyball, brisk walking)	10-30 minutes	6-7	0	0	5	1	2	0	0	0	0	0	8	0
1974	Woman	159	68	26.8977	20	Mixed system	200	Yes	2-3 years ago	11 and more	The pain comes and goes once a month						1					1	4 (moderate)	No	Yes	I am receiving private rehabilitation/physiotherapy treatment	Partly		1	1				I don't use any other help, I do them myself	Gentle physical activity (not causing rapid breathing, e.g. walking)	10-30 minutes	2-3											0	1
1976	Woman	170	68	23.5294	18	Two-shift system (day/night), 12-hour shifts	150	Yes	2-3 years ago	1-5	The pain has come and gone several times in my professional life.	1								1			3 (mild/moderate)	No	No	Other ways	I don't feel it		1					I don't use any other help, I do them myself	Moderate, moderate physical activity (causing your breathing to get a little faster and your heart to beat a little faster, e.g. cycling, playing volleyball, brisk walking)	50 minutes or more	2-3	2	0	0	1	2	1	0	0	0	0	6	1
1972	Woman	168	80	28.3447	28	Two-shift system (day/night), 12-hour shifts	150	Yes	10 or more years ago	11 and more	Constant (I have constant pain, all day and often at night, with varying intensity)			1			1			1		1	5 (moderate/strong)	No	Yes	I am receiving private rehabilitation/physiotherapy treatment	Partly	1		1	1			I don't use any other help, I do them myself	Moderate, moderate physical activity (causing your breathing to get a little faster and your heart to beat a little faster, e.g. cycling, playing volleyball, brisk walking)	10-30 minutes	2-3	3	1	2	1	2	2	2	1	1	2	17	2
1976	Woman	169	79	27.6601	23	Two-shift system (day/night), 12-hour shifts	200	Yes	2-3 years ago	1-5	The pain comes and goes once a week						1					1	4 (moderate)	No	No	No - I am not undergoing treatment	I don't feel it		1	1				I don't use any other help, I do them myself	Gentle physical activity (not causing rapid breathing, e.g. walking)	30-50 minutes	2-3	0	0	0	0	4	0	0	0	2	0	6	0
1973	Woman	160	60	23.4375	27	Two-shift system (day/night), 12-hour shifts	150	Yes	10 or more years ago	1-5	The pain has come and gone several times in my professional life.							1				1	4 (moderate)	No	Yes	Other ways	I don't feel it	1	1		1			Help from another person	Gentle physical activity (not causing rapid breathing, e.g. walking)	50 minutes or more	2-3											0	0
1977	Woman	168	57	20.1956	19	Two-shift system (day/night), 12-hour shifts	160	Yes	4-6 years ago	1-5	The pain comes and goes once a day						1					1	4 (moderate)	No	Yes	I am receiving private rehabilitation/physiotherapy treatment	Partly		1		1			Help from another person	Moderate, moderate physical activity (causing your breathing to get a little faster and your heart to beat a little faster, e.g. cycling, playing volleyball, brisk walking)	10-30 minutes	4-5	0	0	1	1	1	1	2	0	2	0	8	1
1997	Woman	165	88	32.3232	5	Two-shift system (day/night), 12-hour shifts	160	Yes	2-3 years ago	1-5	The pain comes and goes once a day						1					1	4 (moderate)	No	Yes	I am receiving private rehabilitation/physiotherapy treatment	Partly	1	1					I don't use any other help, I do them myself	Moderate, moderate physical activity (causing your breathing to get a little faster and your heart to beat a little faster, e.g. cycling, playing volleyball, brisk walking)	10-30 minutes	2-3											0	1
1958	Woman	164	70	26.0262	45	Two-shift system (day/night), 12-hour shifts	108	Yes	10 or more years ago	6-10	The pain comes and goes once a day								1			1	4 (moderate)	No	Yes	I am receiving private rehabilitation/physiotherapy treatment	Partly		1					Help from another person	Gentle physical activity (not causing rapid breathing, e.g. walking)	10-30 minutes	4-5											0	2
1971	Woman	158	51	20.4294	32	Two-shift system (day/night), 12-hour shifts	164	Yes	4-6 years ago	6-10	Constant (I have constant pain, all day and often at night, with varying intensity)	1					1			1		1	8 (very strong)	Yes	Yes	I am using the National Health Fund's rehabilitation/physiotherapy treatment	Limitations make my work difficult			1				Help from another person	Moderate, moderate physical activity (causing your breathing to get a little faster and your heart to beat a little faster, e.g. cycling, playing volleyball, brisk walking)	30-50 minutes	2-3	2	1	1	2	1	1	2	1	1	1	13	1
1966	Woman	155	80	33.2986	36	Single-shift system, fixed working hours from Monday to Friday	160	Yes	10 or more years ago	1-5	The pain has come and gone several times in my professional life.	1						1		1		1	6 (strong)	Yes	Yes	I am using the National Health Fund's rehabilitation/physiotherapy treatment	Partly		1					Help from another person	Moderate, moderate physical activity (causing your breathing to get a little faster and your heart to beat a little faster, e.g. cycling, playing volleyball, brisk walking)	50 minutes or more	4-5	1	0	1	2	1	0	0	1	0	1	7	1
1967	Woman	162	97	36.9608	36	Two-shift system (day/night), 12-hour shifts	180	Yes	4-6 years ago	1-5	The pain comes and goes once a week		1				1			1		1	5 (moderate/strong)	No	Yes	I am receiving private rehabilitation/physiotherapy treatment	Partly	1	1			1		Help from another person	Gentle physical activity (not causing rapid breathing, e.g. walking)	10-30 minutes	2-3	3	3	3	2	1	0	2	1	1	1	17	2
1970	Woman	178	74	23.3556	32	Two-shift system (day/night), 12-hour shifts	180	Yes	10 or more years ago	11 and more	The pain comes and goes once a day	1						1		1		1	4 (moderate)	Yes	Yes	I am receiving private rehabilitation/physiotherapy treatment	Partly	1						Help from another person	Gentle physical activity (not causing rapid breathing, e.g. walking)	10-30 minutes	2-3	0	0	1	0	2	1	1	0	1	1	7	1
1972	Woman	164	68	25.2826	30	24 hour shifts	156	Yes	4-6 years ago	11 and more	The pain comes and goes once a day	1			1			1		1	1	1	4 (moderate)	Yes	Yes	I am receiving private rehabilitation/physiotherapy treatment	Partly	1	1					Help from another person	Gentle physical activity (not causing rapid breathing, e.g. walking)	10-30 minutes	2-3	2	0	3	2	0	0	2	1	2	1	13	1
1996	Woman	168	56	19.8413	4	Two-shift system (day/night), 12-hour shifts	160	Yes	2-3 years ago	1-5	The pain comes and goes once a day	1					1			1		1	3 (mild/moderate)	No	No	I am receiving private rehabilitation/physiotherapy treatment	Partly		1		1			Another way	Moderate, moderate physical activity (causing your breathing to get a little faster and your heart to beat a little faster, e.g. cycling, playing volleyball, brisk walking)	10-30 minutes	2-3	2	0	0	2	4	1	0	0	2	1	12	1
1999	Woman	174	61	20.148	1	Two-shift system (day/night), 12-hour shifts	140	Yes	2-3 years ago	1-5	The pain comes and goes once a month	1								1			3 (mild/moderate)	No	No	Other ways	I don't feel it				1			I don't use any other help, I do them myself	Moderate, moderate physical activity (causing your breathing to get a little faster and your heart to beat a little faster, e.g. cycling, playing volleyball, brisk walking)	10-30 minutes	1	1	0	1	2	3	1	0	0	0	0	8	1
1991	Woman	164	54	20.0773	10	Mixed system	200	Yes	2-3 years ago	1-5	The pain comes and goes once a week						1					1	5 (moderate/strong)	No	No	Other ways	I don't feel it	1	1	1				I don't use any other help, I do them myself	Moderate, moderate physical activity (causing your breathing to get a little faster and your heart to beat a little faster, e.g. cycling, playing volleyball, brisk walking)	50 minutes or more	1	2	0	1	1	0	2	0	0	0	0	6	1
1965	Woman	165	64	23.5078	35	Two-shift system (day/night), 12-hour shifts	160	Yes	10 or more years ago	11 and more	Constant (I have constant pain, all day and often at night, with varying intensity)			1				1		1		1	4 (moderate)	No	Yes	I am using the National Health Fund's rehabilitation/physiotherapy treatment	Partly		1					Help from another person	Moderate, moderate physical activity (causing your breathing to get a little faster and your heart to beat a little faster, e.g. cycling, playing volleyball, brisk walking)	30-50 minutes	4-5	1	0	3	1	4	0	0	1	0	1	11	1
1974	Woman	166	66	23.9512	25	Two-shift system (day/night), 12-hour shifts	146	Yes	10 or more years ago	11 and more	The pain comes and goes once a week						1					1	4 (moderate)	No	No	Other ways	I don't feel it	1	1	1				Help from another person	Moderate, moderate physical activity (causing your breathing to get a little faster and your heart to beat a little faster, e.g. cycling, playing volleyball, brisk walking)	10-30 minutes	2-3											0	1
1966	Woman	160	80	31.25	35	Two-shift system (day/night), 12-hour shifts	160	Yes	10 or more years ago	11 and more	The pain comes and goes once a week			1			1			1		1	4 (moderate)	Yes	Yes	I am using the National Health Fund's rehabilitation/physiotherapy treatment	Partly	1	1	1	1	1	1	I don't use any other help, I do them myself	Moderate, moderate physical activity (causing your breathing to get a little faster and your heart to beat a little faster, e.g. cycling, playing volleyball, brisk walking)	50 minutes or more	1	1	0	0	3	1	2	2	2	1	2	14	2
1966	Woman	165	62	22.7732	34	Two-shift system (day/night), 12-hour shifts	156	Yes	10 or more years ago	11 and more	Constant (I have constant pain, all day and often at night, with varying intensity)						1					1	5 (moderate/strong)	Yes	Yes	Medical advice	Partly			1			1	I don't use any other help, I do them myself	Moderate, moderate physical activity (causing your breathing to get a little faster and your heart to beat a little faster, e.g. cycling, playing volleyball, brisk walking)	30-50 minutes	4-5											0	2
1993	Woman	170	68	23.5294	5	Two-shift system (day/night), 12-hour shifts	180	Yes	2-3 years ago	1-5	The pain has come and gone several times in my professional life.							1				1	4 (moderate)	No	No	I am receiving private rehabilitation/physiotherapy treatment	Partly		1			1		I don't use any other help, I do them myself	I didn't do it	not applicable	1	0	0	0	0	2	2	1	0	0	0	5	0
1977	Woman	164	63	23.4236	17	Two-shift system (day/night), 12-hour shifts	166	Yes	7 - 9 years ago	11 and more	The pain comes and goes once a week							1				1	6 (strong)	No	Yes	Medical advice	Partly	1	1					Help from another person	I didn't do it	not applicable												0	2
1988	Woman	171	69	23.597	7	Mixed system	240	Yes	2-3 years ago	1-5	The pain has come and gone several times in my professional life.		1					1		1		1	3 (mild/moderate)	No	No	No - I am not undergoing treatment	I don't feel it			1	1			Help from another person	Gentle physical activity (not causing rapid breathing, e.g. walking)	30-50 minutes	1	2	0	0	1	3	1	0	1	0	0	8	0
1968	Woman	165	91	33.4252	33	Single-shift system, fixed working hours from Monday to Friday	160	Yes	10 or more years ago	6-10	Constant (I have constant pain, all day and often at night, with varying intensity)	1			1		1			1	1	1	4 (moderate)	Yes	Yes	I am receiving private rehabilitation/physiotherapy treatment	Partly		1	1	1			Help from another person	Gentle physical activity (not causing rapid breathing, e.g. walking)	10-30 minutes	6-7	2	0	1	1	2	2	1	1	2	2	14	1
1988	Woman	169	70	24.5089	11	Two-shift system (day/night), 12-hour shifts	160	Yes	7 - 9 years ago	1-5	The pain comes and goes once a month							1				1	4 (moderate)	No	Yes	Medical advice	Partly		1	1				Help from another person	Gentle physical activity (not causing rapid breathing, e.g. walking)	30-50 minutes	4-5	0	0	0	0	1	0	0	0	0	0	1	0
1971	Woman	154	58	24.4561	32	Two-shift system (day/night), 12-hour shifts	170	Yes	10 or more years ago	11 and more	The pain comes and goes once a month				1			1		1	1	1	6 (strong)	Yes	Yes	I am using the National Health Fund's rehabilitation/physiotherapy treatment	Limitations make my work difficult	1	1	1	1	1		I don't use any other help, I do them myself	Moderate, moderate physical activity (causing your breathing to get a little faster and your heart to beat a little faster, e.g. cycling, playing volleyball, brisk walking)	50 minutes or more	2-3	2	0	3	3	2	2	2	2	1	1	18	1
1964	Woman	171	84	28.7268	36	Two-shift system (day/night), 12-hour shifts	200	Yes	4-6 years ago	11 and more	The pain comes and goes once a week	1						1		1		1	6 (strong)	No	Yes	I am using the National Health Fund's rehabilitation/physiotherapy treatment	Partly	1		1				I don't use any other help, I do them myself	I didn't do it	not applicable	1	3	1	1	0	0	1	2	1	1	1	11	1
1989	Woman	170	80	27.6817	10	Single-shift system, fixed working hours from Monday to Friday	170	Yes	4-6 years ago	1-5	Constant (I have constant pain, all day and often at night, with varying intensity)						1					1	4 (moderate)	No	Yes	No - I am not undergoing treatment	I don't feel it	1	1			1		I don't use any other help, I do them myself	Gentle physical activity (not causing rapid breathing, e.g. walking)	10-30 minutes	6-7	0	0	0	0	5	1	0	0	0	0	6	2
1975	Woman	178	65	20.5151	25	Single-shift system, fixed working hours from Monday to Friday	160	Yes	10 or more years ago	11 and more	The pain comes and goes once a month	1						1		1		1	6 (strong)	No	Yes	I am receiving private rehabilitation/physiotherapy treatment	Partly	1			1	1		Help from another person	Moderate, moderate physical activity (causing your breathing to get a little faster and your heart to beat a little faster, e.g. cycling, playing volleyball, brisk walking)	30-50 minutes	6-7	0	0	0	0	2	1	0	0	0	0	3	0
1974	Woman	165	54	19.8347	23	Two-shift system (day/night), 12-hour shifts	150	Yes	4-6 years ago	1-5	The pain comes and goes once a week			1				1		1		1	7 (strong/very strong)	Yes	Yes	I am using the National Health Fund's rehabilitation/physiotherapy treatment	Partly	1	1			1		I don't use any other help, I do them myself	Moderate, moderate physical activity (causing your breathing to get a little faster and your heart to beat a little faster, e.g. cycling, playing volleyball, brisk walking)	10-30 minutes	1	2	0	3	2	3	2	1	1	1	2	17	0
1970	Woman	154	56	23.6128	32	Two-shift system (day/night), 12-hour shifts	160	Yes	10 or more years ago	11 and more	The pain comes and goes once a month	1			1			1		1	1	1	6 (strong)	Yes	Yes	I am using the National Health Fund's rehabilitation/physiotherapy treatment	Limitations make my work difficult	1	1	1	1	1		I don't use any other help, I do them myself	Moderate, moderate physical activity (causing your breathing to get a little faster and your heart to beat a little faster, e.g. cycling, playing volleyball, brisk walking)	50 minutes or more	2-3	2	0	3	3	2	2	2	2	1	1	18	1
1966	Woman	171	85	29.0688	36	Two-shift system (day/night), 12-hour shifts	190	Yes	7 - 9 years ago	11 and more	The pain comes and goes once a week	1						1		1		1	6 (strong)	No	Yes	I am using the National Health Fund's rehabilitation/physiotherapy treatment	Partly	1		1				I don't use any other help, I do them myself	I didn't do it	not applicable	1	3	1	1	0	0	1	2	1	1	1	11	1
1990	Woman	170	81	28.0277	10	Single-shift system, fixed working hours from Monday to Friday	180	Yes	4-6 years ago	1-5	Constant (I have constant pain, all day and often at night, with varying intensity)						1					1	4 (moderate)	No	Yes	No - I am not undergoing treatment	I don't feel it	1	1			1		I don't use any other help, I do them myself	Gentle physical activity (not causing rapid breathing, e.g. walking)	10-30 minutes	6-7	0	0	0	0	5	1	0	0	0	0	6	2
1976	Woman	179	65	20.2865	25	Single-shift system, fixed working hours from Monday to Friday	170	Yes	10 or more years ago	11 and more	The pain comes and goes once a month	1							1	1		1	6 (strong)	No	Yes	I am receiving private rehabilitation/physiotherapy treatment	Partly	1			1	1		Help from another person	Moderate, moderate physical activity (causing your breathing to get a little faster and your heart to beat a little faster, e.g. cycling, playing volleyball, brisk walking)	30-50 minutes	6-7	0	0	0	0	2	1	0	0	0	0	3	0
1975	Woman	164	54	20.0773	23	Two-shift system (day/night), 12-hour shifts	170	Yes	4-6 years ago	1-5	The pain comes and goes once a week			1				1		1		1	7 (strong/very strong)	Yes	Yes	I am using the National Health Fund's rehabilitation/physiotherapy treatment	Partly	1	1			1		I don't use any other help, I do them myself	Moderate, moderate physical activity (causing your breathing to get a little faster and your heart to beat a little faster, e.g. cycling, playing volleyball, brisk walking)	10-30 minutes	1	2	0	3	2	3	2	1	1	1	2	17	0
1996	Woman	167	65	23.3067	3	Mixed system	160	Yes	2-3 years ago	1-5	The pain has come and gone several times in my professional life.	1								1			3 (mild/moderate)	No	No	Other ways	Partly				1	1	1	I don't use any other help, I do them myself	Gentle physical activity (not causing rapid breathing, e.g. walking)	10-30 minutes	1	1	0	0	1	1	1	0	0	2	1	7
1980	Woman	165	62	22.7732	21	Mixed system	160	Yes	10 or more years ago	11 and more	The pain comes and goes once a month		1		1			1		1	1	1	8 (very strong)	Yes	Yes	I am receiving private rehabilitation/physiotherapy treatment	Partly			1				I don't use any other help, I do them myself	Gentle physical activity (not causing rapid breathing, e.g. walking)	10-30 minutes	4-5	0	0	1	2	3	1	1	1	1	2	12	3
1972	Woman	168	78	27.6361	30	Two-shift system (day/night), 12-hour shifts	160	Yes	10 or more years ago	11 and more	The pain comes and goes once a day	1			1		1			1	1	1	5 (moderate/strong)	No		I am using the National Health Fund's rehabilitation/physiotherapy treatment	Partly	1	1	1				Help from another person	Moderate, moderate physical activity (causing your breathing to get a little faster and your heart to beat a little faster, e.g. cycling, playing volleyball, brisk walking)	30-50 minutes	2-3	2	0	1	1	2	1	2	0	1	1	11	1
1986	Woman	168	60	21.2585	14	Mixed system	170	Yes	1 year ago	1-5	The pain has come and gone several times in my professional life.							1				1	9 (very severe/the worst pain imaginable)	Yes	Yes	I am using the National Health Fund's rehabilitation/physiotherapy treatment	Partly	1		1		1		Help from another person	Moderate, moderate physical activity (causing your breathing to get a little faster and your heart to beat a little faster, e.g. cycling, playing volleyball, brisk walking)	10-30 minutes	2-3											0	0
1994	Woman	165	68	24.977	6	Two-shift system (day/night), 12-hour shifts	200	Yes	4-6 years ago	1-5	The pain has come and gone several times in my professional life.						1					1	5 (moderate/strong)	No	Yes	I am using the National Health Fund's rehabilitation/physiotherapy treatment	Partly	1				1		Help from another person	Moderate, moderate physical activity (causing your breathing to get a little faster and your heart to beat a little faster, e.g. cycling, playing volleyball, brisk walking)	30-50 minutes	2-3	2	0	0	1	2	1	0	0	0	1	7	0
1973	Woman	168	81	28.699	30	Mixed system	240	Yes	7 - 9 years ago	6-10	The pain has come and gone several times in my professional life.	1			1		1				1	1	6 (strong)	No	Yes	Other ways	I don't feel it	1	1	1				Help from another person	Gentle physical activity (not causing rapid breathing, e.g. walking)	10-30 minutes	1											0	1
1968	Woman	165	72	26.4463	34	Single-shift system, fixed working hours from Monday to Friday	156	Yes	10 or more years ago	11 and more	Constant (I have constant pain, all day and often at night, with varying intensity)			1				1		1		1	8 (very strong)	Yes	Yes	I am using the National Health Fund's rehabilitation/physiotherapy treatment	Partly				1	1		Help from another person	Moderate, moderate physical activity (causing your breathing to get a little faster and your heart to beat a little faster, e.g. cycling, playing volleyball, brisk walking)	10-30 minutes	2-3	1	0	2	2	3	2	2	2	2	2	18	1
1962	Woman	164	62	23.0518	38	Single-shift system, fixed working hours from Monday to Friday	160	Yes	10 or more years ago	11 and more	Constant (I have constant pain, all day and often at night, with varying intensity)			1	1				1	1	1	1	6 (strong)	Yes	Yes	I am receiving private rehabilitation/physiotherapy treatment	Partly	1	1	1		1		Help from another person	Moderate, moderate physical activity (causing your breathing to get a little faster and your heart to beat a little faster, e.g. cycling, playing volleyball, brisk walking)	30-50 minutes	1	2	1	2	1	1	1	1	0	2	1	12	4
1961	Woman	157	78	31.6443	40	Two-shift system (day/night), 12-hour shifts	168	Yes	10 or more years ago	1-5	The pain comes and goes once a day						1					1	5 (moderate/strong)	No	No	No - I am not undergoing treatment	Partly		1			1		Help from another person	Gentle physical activity (not causing rapid breathing, e.g. walking)	10-30 minutes	2-3	1	0	1	1	0	1	1	0	1	4	10	0
1966	Woman	165	75	27.5482	34	Single-shift system, fixed working hours from Monday to Friday	200	Yes	4-6 years ago	1-5	Constant (I have constant pain, all day and often at night, with varying intensity)		1							1			5 (moderate/strong)	Yes	Yes	I am receiving private rehabilitation/physiotherapy treatment	Partly			1				I don't use any other help, I do them myself	Gentle physical activity (not causing rapid breathing, e.g. walking)	30-50 minutes	2-3	2	0	1	1	1	1	2	1	1	1	11	1
1996	Woman	165	87	31.9559	5	Two-shift system (day/night), 12-hour shifts	160	Yes	2-3 years ago	1-5	The pain comes and goes once a day						1					1	4 (moderate)	No	Yes	I am receiving private rehabilitation/physiotherapy treatment	Partly	1	1					I don't use any other help, I do them myself	Gentle physical activity (not causing rapid breathing, e.g. walking)	10-30 minutes	2-3											0	1
1971	Woman	170	65	22.4913	30	Two-shift system (day/night), 12-hour shifts	160	Yes	10 or more years ago	11 and more	Constant (I have constant pain, all day and often at night, with varying intensity)			1	1		1			1	1	1	5 (moderate/strong)	No	Yes	I am using the National Health Fund's rehabilitation/physiotherapy treatment	Limitations make my work difficult	1	1			1		I don't use any other help, I do them myself	Moderate, moderate physical activity (causing your breathing to get a little faster and your heart to beat a little faster, e.g. cycling, playing volleyball, brisk walking)	10-30 minutes	4-5	1	1	1	2	1	1	0		0	2	9	1
1985	Woman	160	56	21.875	13	Two-shift system (day/night), 12-hour shifts	170	Yes	10 or more years ago	6-10	The pain comes and goes once a year							1				1	5 (moderate/strong)	No	No	I am receiving private rehabilitation/physiotherapy treatment	I don't feel it	1	1	1				Help from another person	Gentle physical activity (not causing rapid breathing, e.g. walking)	10-30 minutes	4-5											0	0
1968	Woman	160	60	23.4375	32	Two-shift system (day/night), 12-hour shifts	180	Yes	4-6 years ago	6-10	The pain comes and goes once a month						1					1	2 (mild)	No	Yes	I am receiving private rehabilitation/physiotherapy treatment	Partly	1	1		1			I don't use any other help, I do them myself	Moderate, moderate physical activity (causing your breathing to get a little faster and your heart to beat a little faster, e.g. cycling, playing volleyball, brisk walking)	10-30 minutes	4-5	0	0	1		1	1	1	1	1	1	7	1
1969	Woman	159	89	35.2043	30	Two-shift system (day/night), 12-hour shifts	160	Yes	4-6 years ago	6-10	Constant (I have constant pain, all day and often at night, with varying intensity)			1	1			1		1	1	1	6 (strong)	Yes	Yes	I am using the National Health Fund's rehabilitation/physiotherapy treatment	Limitations make my work difficult		1	1	1	1		Help from another person	Gentle physical activity (not causing rapid breathing, e.g. walking)	30-50 minutes	2-3	3	1	1	2	2	1	2	2	1	2	17	1
1965	Woman	167	88	31.5537	34	Two-shift system (day/night), 12-hour shifts	180	Yes	10 or more years ago	1-5	The pain comes and goes once a day	1						1		1		1	4 (moderate)	No	Yes	I am receiving private rehabilitation/physiotherapy treatment	Partly		1					Help from another person	Moderate, moderate physical activity (causing your breathing to get a little faster and your heart to beat a little faster, e.g. cycling, playing volleyball, brisk walking)	50 minutes or more	4-5	0	0	0	0	3	0	0	0	0	0	3	0
1957	Woman	157	57	23.1247	39	Two-shift system (day/night), 12-hour shifts	170	Yes	7 - 9 years ago	11 and more	Constant (I have constant pain, all day and often at night, with varying intensity)							1				1	5 (moderate/strong)	Yes	Yes	Medical advice	Partly				1			I don't use any other help, I do them myself	I didn't do it	not applicable		3	0	0	2	3	1	0	1	2	1	13	1
1979	Woman	172	63	21.2953	18	Two-shift system (day/night), 12-hour shifts	160	Yes	7 - 9 years ago	6-10	The pain comes and goes once a month	1								1			4 (moderate)	No	Yes	No - I am not undergoing treatment	I don't feel it		1		1			I don't use any other help, I do them myself	Gentle physical activity (not causing rapid breathing, e.g. walking)	30-50 minutes	2-3	2	0	2	1	2	0	0	0	0	1	8
1975	Woman	176	77	24.858	27	Two-shift system (day/night), 12-hour shifts	170	Yes	4-6 years ago	1-5	The pain comes and goes once a year						1					1	4 (moderate)	No	Yes	Other ways	Partly	1	1					I don't use any other help, I do them myself	Gentle physical activity (not causing rapid breathing, e.g. walking)	not applicable	2-3	1	1	0	1	0	0	0	0	0	0	3	1
1964	Woman	169	67	23.4586	36	Two-shift system (day/night), 12-hour shifts	160	Yes	10 or more years ago	11 and more	The pain comes and goes once a year	1					1			1		1	4 (moderate)	No	Yes	No - I am not undergoing treatment	Partly	1						Help from another person	Gentle physical activity (not causing rapid breathing, e.g. walking)	30-50 minutes	2-3	0	0	1	0	2	0	0	0	0	0	3	0
1971	Woman	178	80	25.2493	25	Two-shift system (day/night), 12-hour shifts	150	Yes	10 or more years ago	11 and more	The pain comes and goes once a day		1		1			1		1	1	1	4 (moderate)	Yes	Yes	I am using the National Health Fund's rehabilitation/physiotherapy treatment	Partly	1	1	1	1			Help from another person	Gentle physical activity (not causing rapid breathing, e.g. walking)	10-30 minutes	2-3	1	1	4	3	2	1	2	1	2	1	18	1
1964	Woman	160	73	28.5156	38	Two-shift system (day/night), 12-hour shifts	180	Yes	4-6 years ago	1-5	The pain has come and gone several times in my professional life.	1					1			1		1	4 (moderate)	No	No	No - I am not undergoing treatment	I don't feel it	1		1				Help from another person	Moderate, moderate physical activity (causing your breathing to get a little faster and your heart to beat a little faster, e.g. cycling, playing volleyball, brisk walking)	50 minutes or more	4-5	0	0	0	2	0	1	2	0	0	0	5	0
1965	Woman	164	62	23.0518	36	Two-shift system (day/night), 12-hour shifts	150	Yes	10 or more years ago	11 and more	Constant (I have constant pain, all day and often at night, with varying intensity)						1					1	4 (moderate)	No	Yes	I am using the National Health Fund's rehabilitation/physiotherapy treatment	Limitations make my work difficult	1	1					I don't use any other help, I do them myself	Moderate, moderate physical activity (causing your breathing to get a little faster and your heart to beat a little faster, e.g. cycling, playing volleyball, brisk walking)	50 minutes or more	1											0	2
1970	Woman	164	64	23.7954	30	Two-shift system (day/night), 12-hour shifts	160	Yes	4-6 years ago	1-5	The pain comes and goes once a year							1				1	4 (moderate)	No	No	I am receiving private rehabilitation/physiotherapy treatment	Partly		1					I don't use any other help, I do them myself	Moderate, moderate physical activity (causing your breathing to get a little faster and your heart to beat a little faster, e.g. cycling, playing volleyball, brisk walking)	30-50 minutes	2-3											0	0
1971	Woman	158	59	23.634	24	Two-shift system (day/night), 12-hour shifts	160	Yes	2-3 years ago	1-5	The pain has come and gone several times in my professional life.		1							1			4 (moderate)	No	Yes	I am receiving private rehabilitation/physiotherapy treatment	I don't feel it			1				I don't use any other help, I do them myself	Moderate, moderate physical activity (causing your breathing to get a little faster and your heart to beat a little faster, e.g. cycling, playing volleyball, brisk walking)	50 minutes or more	2-3	0	0	0	0	2	2	0	0	0	0	4	0
2000	Woman	160	58	22.6562	1	Two-shift system (day/night), 12-hour shifts	150	Yes	1 year ago	1-5	The pain comes and goes once a week	1					1			1		1	2 (mild)	No	No	No - I am not undergoing treatment	I don't feel it				1			Help from another person	Gentle physical activity (not causing rapid breathing, e.g. walking)	10-30 minutes	1	1	0	1	2	2	1	0	1	1	1	10	0
1968	Woman	158	59	23.634	30	Two-shift system (day/night), 12-hour shifts	160	Yes	10 or more years ago	11 and more	The pain comes and goes once a week	1						1		1		1	10 (the worst pain imaginable)	Yes	Yes	I am receiving private rehabilitation/physiotherapy treatment	Limitations make my work difficult		1		1	1		I don't use any other help, I do them myself	Moderate, moderate physical activity (causing your breathing to get a little faster and your heart to beat a little faster, e.g. cycling, playing volleyball, brisk walking)	10-30 minutes	2-3	1	2	3	2	2	1	2	1	2	1	17	1
1969	Woman	162	57	21.7193	28	Single-shift system, fixed working hours from Monday to Friday	170	Yes	10 or more years ago	6-10	The pain comes and goes once a week						1					1	5 (moderate/strong)	No	No	I am using the National Health Fund's rehabilitation/physiotherapy treatment	Partly	1	1					I don't use any other help, I do them myself	Moderate, moderate physical activity (causing your breathing to get a little faster and your heart to beat a little faster, e.g. cycling, playing volleyball, brisk walking)	10-30 minutes	2-3	1	0	1	1	1	1	0	1	0	1	7	1
1989	Woman	170	61	21.1073	9	Single-shift system, fixed working hours from Monday to Friday	160	Yes	4-6 years ago	1-5	The pain comes and goes once a month				1		1				1	1	3 (mild/moderate)	No	No	No - I am not undergoing treatment	Partly		1		1		1	I don't use any other help, I do them myself	Intense physical activity (causing very rapid breathing and a very rapid heart rate, e.g. aerobics, fast running, fast cycling)	10-30 minutes	4-5	0	0	1	0	3	1	0	0	0	0	5	0
1971	Woman	160	60	23.4375	27	Two-shift system (day/night), 12-hour shifts	250	No		0																												0		0	0	1	1	0	0	0	0	2	0
1991	Woman	164	54	20.0773	10	Mixed system	200	Yes	2-3 years ago	1-5	The pain has come and gone several times in my professional life.				1		1				1	1	5 (moderate/strong)	No	No	Other ways	I don't feel it	1	1	1				I don't use any other help, I do them myself	Moderate, moderate physical activity (causing your breathing to get a little faster and your heart to beat a little faster, e.g. cycling, playing volleyball, brisk walking)	50 minutes or more	1	2	0	1	1	0	2	0	0	0	0	6	1
1966	Woman	163	64	24.0882	35	Two-shift system (day/night), 12-hour shifts	160	Yes	10 or more years ago	11 and more	Constant (I have constant pain, all day and often at night, with varying intensity)			1				1		1		1	4 (moderate)	No	Yes	I am using the National Health Fund's rehabilitation/physiotherapy treatment	Partly		1					Help from another person	Gentle physical activity (not causing rapid breathing, e.g. walking)	30-50 minutes	4-5	1	0	1	1	2	0	0	1	0	1	7	1
1975	Woman	166	66	23.9512	25	Two-shift system (day/night), 12-hour shifts	146	Yes	10 or more years ago	11 and more	The pain comes and goes once a week						1					1	4 (moderate)	No	No	Other ways	I don't feel it	1	1	1				Help from another person	Moderate, moderate physical activity (causing your breathing to get a little faster and your heart to beat a little faster, e.g. cycling, playing volleyball, brisk walking)	10-30 minutes	2-3											0	1
1967	Woman	160	80	31.25	35	Two-shift system (day/night), 12-hour shifts	160	Yes	10 or more years ago	11 and more	The pain comes and goes once a week			1			1			1		1	4 (moderate)	Yes	Yes	I am using the National Health Fund's rehabilitation/physiotherapy treatment	Partly	1	1	1	1	1	1	I don't use any other help, I do them myself	Gentle physical activity (not causing rapid breathing, e.g. walking)	50 minutes or more	1	1	0	0	3	1	2	2	2	1	2	14	2
1967	Woman	164	65	24.1672	35	Two-shift system (day/night), 12-hour shifts	156	Yes	10 or more years ago	11 and more	Constant (I have constant pain, all day and often at night, with varying intensity)						1					1	5 (moderate/strong)	Yes	Yes	Medical advice	Partly			1			1	I don't use any other help, I do them myself	Moderate, moderate physical activity (causing your breathing to get a little faster and your heart to beat a little faster, e.g. cycling, playing volleyball, brisk walking)	30-50 minutes	4-5											0	2
1992	Woman	170	68	23.5294	6	Two-shift system (day/night), 12-hour shifts	180	Yes	2-3 years ago	1-5	The pain has come and gone several times in my professional life.							1				1	4 (moderate)	No	No	I am receiving private rehabilitation/physiotherapy treatment	Partly		1				1	I don't use any other help, I do them myself	I didn't do it	not applicable	1	0	0	0	0	2	2	1	0	0	0	5	0
1975	Woman	165	65	23.8751	18	Two-shift system (day/night), 12-hour shifts	166	Yes	7 - 9 years ago	11 and more	The pain comes and goes once a week							1				1	6 (strong)	No	Yes	Medical advice	Partly	1	1					Help from another person	I didn't do it	not applicable												0	2
1987	Woman	172	69	23.3234	7	Mixed system	240	Yes	2-3 years ago	0	The pain has come and gone several times in my professional life.		1					1		1		1	3 (mild/moderate)	No	No	No - I am not undergoing treatment	I don't feel it			1	1			Help from another person	Gentle physical activity (not causing rapid breathing, e.g. walking)	30-50 minutes	1	2	0	0	1	3	1	0	1	0	0	8	0
1961	Woman	164	74	27.5134	39	Two-shift system (day/night), 12-hour shifts	160	Yes	2-3 years ago	1-5	The pain has come and gone several times in my professional life.						1					1	4 (moderate)	No	No	I am receiving private rehabilitation/physiotherapy treatment	Partly		1				1	Help from another person	Gentle physical activity (not causing rapid breathing, e.g. walking)	10-30 minutes	2-3											0	1
1964	Woman	156	63	25.8876	40	Two-shift system (day/night), 12-hour shifts	170	Yes	10 or more years ago	11 and more	The pain comes and goes once a week		1					1		1		1	7 (strong/very strong)	Yes	Yes	I am using the National Health Fund's rehabilitation/physiotherapy treatment	Partly				1			Another way	Gentle physical activity (not causing rapid breathing, e.g. walking)	10-30 minutes	2-3	2	1	2	2	3	0	1	2	2	2	17	1
1969	Woman	153	80	34.1749	33	Two-shift system (day/night), 12-hour shifts	168	Yes	2-3 years ago	1-5	The pain has come and gone several times in my professional life.	1			1		1			1	1	1	3 (mild/moderate)	No	Yes	Medical advice	I don't feel it	1				1		I don't use any other help, I do them myself	Gentle physical activity (not causing rapid breathing, e.g. walking)	30-50 minutes	4-5	2	0	1	1	3	0	2	1	1	1	12	0
1970	Woman	165	66	24.2424	32	Single-shift system, fixed working hours from Monday to Friday	170	Yes	2-3 years ago	1-5	Constant (I have constant pain, all day and often at night, with varying intensity)	1					1			1		1	3 (mild/moderate)	Yes	No	I am receiving private rehabilitation/physiotherapy treatment	Partly				1			I don't use any other help, I do them myself	Moderate, moderate physical activity (causing your breathing to get a little faster and your heart to beat a little faster, e.g. cycling, playing volleyball, brisk walking)	30-50 minutes	2-3	1	0	0	1	2	0	0	2	0	1	7	0
1958	Woman	165	70	25.7117	45	Two-shift system (day/night), 12-hour shifts	108	Yes	10 or more years ago	6-10	The pain comes and goes once a day								1			1	4 (moderate)	No	Yes	I am receiving private rehabilitation/physiotherapy treatment	Partly		1					Help from another person	Gentle physical activity (not causing rapid breathing, e.g. walking)	10-30 minutes	4-5											0	2
1969	Woman	158	51	20.4294	32	Two-shift system (day/night), 12-hour shifts	164	Yes	4-6 years ago	6-10	Constant (I have constant pain, all day and often at night, with varying intensity)	1					1			1		1	8 (very strong)	Yes	Yes	I am using the National Health Fund's rehabilitation/physiotherapy treatment	Limitations make my work difficult			1				Help from another person	Moderate, moderate physical activity (causing your breathing to get a little faster and your heart to beat a little faster, e.g. cycling, playing volleyball, brisk walking)	30-50 minutes	2-3	2	1	1	2	1	1	2	1	1	1	13	1
1965	Woman	156	80	32.8731	36	Single-shift system, fixed working hours from Monday to Friday	160	Yes	10 or more years ago	1-5	The pain has come and gone several times in my professional life.	1					1			1		1	6 (strong)	Yes	Yes	I am using the National Health Fund's rehabilitation/physiotherapy treatment	Partly		1					Help from another person	Moderate, moderate physical activity (causing your breathing to get a little faster and your heart to beat a little faster, e.g. cycling, playing volleyball, brisk walking)	50 minutes or more	4-5	1	0	1	2	1	0	0	1	0	1	7	1
1965	Woman	163	98	36.8851	36	Two-shift system (day/night), 12-hour shifts	180	Yes	4-6 years ago	1-5	The pain comes and goes once a week		1		1		1			1	1	1	5 (moderate/strong)	No	Yes	I am receiving private rehabilitation/physiotherapy treatment	Partly	1	1			1		Help from another person	Gentle physical activity (not causing rapid breathing, e.g. walking)	10-30 minutes	2-3	3	3	3	2	1	0	2	1	1	1	17	2
1970	Woman	177	76	24.2587	32	Two-shift system (day/night), 12-hour shifts	180	Yes	10 or more years ago	11 and more	The pain comes and goes once a day	1						1		1		1	4 (moderate)	Yes	Yes	I am receiving private rehabilitation/physiotherapy treatment	Partly	1						Help from another person	Gentle physical activity (not causing rapid breathing, e.g. walking)	10-30 minutes	2-3	0	0	1	0	2	1	1	0	1	1	7	1
1970	Woman	164	70	26.0262	30	24 hour shifts	156	Yes	4-6 years ago	11 and more	The pain comes and goes once a day	1			1			1		1	1	1	4 (moderate)	Yes	Yes	I am receiving private rehabilitation/physiotherapy treatment	Partly	1	1					Help from another person	Gentle physical activity (not causing rapid breathing, e.g. walking)	10-30 minutes	2-3	2	0	3	2	0	0	2	1	2	1	13	1
1970	Woman	165	88	32.3232	31	Two-shift system (day/night), 12-hour shifts	180	Yes	4-6 years ago	6-10	The pain comes and goes once a month		1		1			1		1	1	1	4 (moderate)	No	Yes	I am receiving private rehabilitation/physiotherapy treatment	Partly	1	1					Help from another person	Gentle physical activity (not causing rapid breathing, e.g. walking)	30-50 minutes	2-3	1	0	2	0	1	0	2	1	1	1	9	0
1969	Woman	169	59	20.6575	33	Two-shift system (day/night), 12-hour shifts	170	Yes	10 or more years ago	11 and more	Constant (I have constant pain, all day and often at night, with varying intensity)	1			1			1		1	1	1	4 (moderate)	No	Yes	No - I am not undergoing treatment	Partly		1	1		1		I don't use any other help, I do them myself	Moderate, moderate physical activity (causing your breathing to get a little faster and your heart to beat a little faster, e.g. cycling, playing volleyball, brisk walking)	10-30 minutes	2-3	1	1	1	2	2	1	2	2	2	1	15	2
1974	Woman	178	66	20.8307	25	Single-shift system, fixed working hours from Monday to Friday	170	Yes	10 or more years ago	11 and more	The pain comes and goes once a month	1			1				1	1	1	1	6 (strong)	No	Yes	I am receiving private rehabilitation/physiotherapy treatment	Partly	1			1	1		Help from another person	Gentle physical activity (not causing rapid breathing, e.g. walking)	30-50 minutes	2-3	0	0	0	0	2	1	0	0	0	0	3	0
1973	Woman	163	54	20.3244	23	Two-shift system (day/night), 12-hour shifts	150	Yes	4-6 years ago	1-5	The pain comes and goes once a week			1				1		1		1	7 (strong/very strong)	Yes	Yes	I am using the National Health Fund's rehabilitation/physiotherapy treatment	Partly	1	1			1		I don't use any other help, I do them myself	Moderate, moderate physical activity (causing your breathing to get a little faster and your heart to beat a little faster, e.g. cycling, playing volleyball, brisk walking)	10-30 minutes	1	2	0	3	2	3	2	1	1	1	2	17	0
1984	Woman	176	75	24.2123	14	Two-shift system (day/night), 12-hour shifts	230	Yes	4-6 years ago	1-5	The pain comes and goes once a week							1				1	5 (moderate/strong)	Yes	Yes	Medical advice	Limitations make my work difficult	1				1		Help from another person	Gentle physical activity (not causing rapid breathing, e.g. walking)	30-50 minutes	2-3											0	1
1983	Woman	165	54	19.8347	5	Two-shift system (day/night), 12-hour shifts	150	No	1 year ago	0	The pain has only come and gone once in my professional life.						1					1	2 (mild)	No	No	No - I am not undergoing treatment	I don't feel it							I don't use any other help, I do them myself	I didn't do it	not applicable	1	0	0	0	0	1	0	5	0	0	0	6	0
1976	Woman	159	68	26.8977	23	Single-shift system, fixed working hours from Monday to Friday	130	Yes	2-3 years ago	11 and more	The pain comes and goes once a week	1						1		1		1	3 (mild/moderate)	No	No	I am using the National Health Fund's rehabilitation/physiotherapy treatment	Limitations prevent me from functioning independently	1	1			1		Help from another person	Gentle physical activity (not causing rapid breathing, e.g. walking)	30-50 minutes	2-3											0	2
[truncated: 10 more columns]
